# Supplementary material for: Guest-Host Complex Formed between Ascorbic Acid and β-Cyclodextrin Immobilized on the Surface of an Electrode
Source: Molecules. 2014 May 9;19(5):5952–64. doi: 10.3390/molecules19055952 (PMC6270920; doi:10.3390/molecules19055952)
Supplement: Supplementary file 1 [file molecules-19-05952-s001.xls]

## Sheet: Datos
																																								Value	Standard Error		Value	Standard Error
											P1	0.000119751	1.1253e-05		P1	0.000207678	1.7301e-05		P1	0.000292501	1.7909e-05		P1	0.000389642	1.4111e-05		P1	0.00047296	1.5965e-05		P1	0.000570031	1.81329e-05		P1	0.000656886	4.29167e-05		P1	0.000730225	3.70339e-05		0.000804213	3.60205e-05
											P2	796.372	4294.24		P2	157.676	832.616		P2	50.3865	209.381		P2	2.44858	7.48651		P2	1.72542	5.11254		P2	8.54284	20.9927		P2	7.35534	38.4861		P2	6.49755	26.4865		6.3421	22.787
											P3	41.2281	4.39579		P3	39.0269	3.79649		P3	38.2616	2.73873		P3	38.0305	1.60279		P3	36.8306	1.44827		P3	35.8924	1.33175		P3	34.0188	2.57529		P3	33.8937	1.99504		33.5566	1.74807
											P4	0.36662	0.11387		P4	0.34252	0.12264		P4	0.3206	0.10114		P4	0.24569	0.07921		P4	0.2418	0.07966		P4	0.29106	0.0661		P4	0.29479	0.14903		P4	0.29422	0.11675		0.29764	0.10396
	10	20	30	40	50	60	70	80	90			10				20				30				40				50				60				70				80				90
0.105743	1.13739e-06	1.87225e-06	2.67548e-06	3.66242e-06	4.55322e-06	5.56335e-06	6.77185e-06	7.80945e-06	8.7616e-06		0.105743	1.96667e-06			0.105743	3.08176e-06			0.105743	3.85934e-06			0.105743	4.54816e-06			0.105743	5.31511e-06			0.105743	6.15552e-06			0.105743	7.60067e-06			0.105743	7.80581e-06			0.105743	7.98452e-06
0.110718	1.45386e-06	2.2934e-06	3.15094e-06	4.2337e-06	5.16968e-06	6.24695e-06	7.50732e-06	8.53882e-06	9.49402e-06		0.110718	2.39615e-06			0.110718	3.7181e-06			0.110718	4.64247e-06			0.110718	5.46853e-06			0.110718	6.35486e-06			0.110718	7.32761e-06			0.110718	8.96355e-06			0.110718	9.20295e-06			0.110718	9.40092e-06
0.115753	1.88507e-06	2.85004e-06	3.83148e-06	4.99268e-06	5.98755e-06	7.15942e-06	8.45947e-06	9.52759e-06	1.04767e-05		0.115753	2.92134e-06			0.115753	4.48981e-06			0.115753	5.5904e-06			0.115753	6.58301e-06			0.115753	7.60738e-06			0.115753	8.73393e-06			0.115753	1.05834e-05			0.115753	1.08638e-05			0.115753	1.1083e-05
0.120728	2.4585e-06	3.60809e-06	4.71191e-06	6.01196e-06	7.08923e-06	8.37402e-06	9.76257e-06	1.08276e-05	1.17889e-05		0.120728	3.5459e-06			0.120728	5.40064e-06			0.120728	6.70762e-06			0.120728	7.8975e-06			0.120728	9.07738e-06			0.120728	1.03782e-05			0.120728	1.24597e-05			0.120728	1.27881e-05			0.120728	1.30304e-05
0.125702	3.19946e-06	4.599e-06	5.87463e-06	7.36694e-06	8.54492e-06	9.9884e-06	1.14533e-05	1.2558e-05	1.3504e-05		0.125702	4.29308e-06			0.125702	6.48324e-06			0.125702	8.03443e-06			0.125702	9.46034e-06			0.125702	1.08171e-05			0.125702	1.23172e-05			0.125702	1.46522e-05			0.125702	1.50377e-05			0.125702	1.53056e-05
0.130707	4.1571e-06	5.88074e-06	7.35169e-06	9.10644e-06	1.04279e-05	1.20667e-05	1.36566e-05	1.47827e-05	1.57318e-05		0.130707	5.18803e-06			0.130707	7.7732e-06			0.130707	9.61514e-06			0.130707	1.13253e-05			0.130707	1.28842e-05			0.130707	1.46137e-05			0.130707	1.72256e-05			0.130707	1.76801e-05			0.130707	1.79769e-05
0.135712	5.34363e-06	7.47681e-06	9.26514e-06	1.1319e-05	1.28143e-05	1.47186e-05	1.64856e-05	1.76544e-05	1.85913e-05		0.135712	6.24641e-06			0.135712	9.29317e-06			0.135712	1.14791e-05			0.135712	1.35292e-05			0.135712	1.5318e-05			0.135712	1.73096e-05			0.135712	2.02202e-05			0.135712	2.07577e-05			0.135712	2.10876e-05
0.140717	6.79016e-06	9.4574e-06	1.16364e-05	1.40869e-05	1.58173e-05	1.80389e-05	2.00104e-05	2.12555e-05	2.22046e-05		0.140717	7.48729e-06			0.140717	1.10724e-05			0.140717	1.36648e-05			0.140717	1.61214e-05			0.140717	1.81713e-05			0.140717	2.04627e-05			0.140717	2.36929e-05			0.140717	2.43311e-05			0.140717	2.47e-05
0.145691	8.50525e-06	1.18469e-05	1.45081e-05	1.74561e-05	1.94733e-05	2.20856e-05	2.43195e-05	2.56897e-05	2.66449e-05		0.145691	8.91735e-06			0.145691	1.31248e-05			0.145691	1.61941e-05			0.145691	1.91324e-05			0.145691	2.14776e-05			0.145691	2.41096e-05			0.145691	2.76774e-05			0.145691	2.84375e-05			0.145691	2.88533e-05
0.150696	1.04797e-05	1.46637e-05	1.79138e-05	2.14722e-05	2.38525e-05	2.6947e-05	2.95075e-05	3.10059e-05	3.20282e-05		0.150696	1.0565e-05			0.150696	1.54994e-05			0.150696	1.9134e-05			0.150696	2.26493e-05			0.150696	2.53337e-05			0.150696	2.8358e-05			0.150696	3.22844e-05			0.150696	3.31948e-05			0.150696	3.36695e-05
0.155701	1.26739e-05	1.78589e-05	2.18384e-05	2.61383e-05	2.89734e-05	3.26141e-05	3.55682e-05	3.73016e-05	3.84094e-05		0.155701	1.24232e-05			0.155701	1.81994e-05			0.155701	2.24992e-05			0.155701	2.66997e-05			0.155701	2.97733e-05			0.155701	3.3248e-05			0.155701	3.75509e-05			0.155701	3.86465e-05			0.155701	3.91967e-05
0.160675	1.50482e-05	2.14203e-05	2.62482e-05	3.14209e-05	3.48023e-05	3.91052e-05	4.25476e-05	4.44916e-05	4.57153e-05		0.160675	1.44663e-05			0.160675	2.12074e-05			0.160675	2.62822e-05			0.160675	3.12879e-05			0.160675	3.48079e-05			0.160675	3.87975e-05			0.160675	4.34924e-05			0.160675	4.48157e-05			0.160675	4.54641e-05
0.16568	1.7514e-05	2.5238e-05	3.10669e-05	3.73047e-05	4.13178e-05	4.62952e-05	5.02624e-05	5.25513e-05	5.39856e-05		0.16568	1.66891e-05			0.16568	2.45444e-05			0.16568	3.05295e-05			0.16568	3.64882e-05			0.16568	4.05306e-05			0.16568	4.51185e-05			0.16568	5.02273e-05			0.16568	5.18344e-05			0.16568	5.26146e-05
0.170685	1.99951e-05	2.92389e-05	3.62701e-05	4.35944e-05	4.83459e-05	5.41382e-05	5.87769e-05	6.14319e-05	6.30798e-05		0.170685	1.90262e-05			0.170685	2.81513e-05			0.170685	3.51925e-05			0.170685	4.22646e-05			0.170685	4.69196e-05			0.170685	5.22017e-05			0.170685	5.77481e-05			0.170685	5.97076e-05			0.170685	6.06651e-05
0.175659	2.23511e-05	3.33099e-05	4.16199e-05	5.02014e-05	5.58167e-05	6.24695e-05	6.78711e-05	7.09839e-05	7.2937e-05		0.175659	2.13844e-05			0.175659	3.19317e-05			0.175659	4.01789e-05			0.175659	4.85313e-05			0.175659	5.3905e-05			0.175659	5.99896e-05			0.175659	6.60032e-05			0.175659	6.83965e-05			0.175659	6.95913e-05
0.180664	2.45026e-05	3.73444e-05	4.70367e-05	5.70068e-05	6.35986e-05	7.1228e-05	7.74536e-05	8.10852e-05	8.34351e-05		0.180664	2.36905e-05			0.180664	3.58266e-05			0.180664	4.54506e-05			0.180664	5.52751e-05			0.180664	6.15066e-05			0.180664	6.8533e-05			0.180664	7.50636e-05			0.180664	7.79955e-05			0.180664	7.95109e-05
0.185669	2.63397e-05	4.11072e-05	5.23682e-05	6.38428e-05	7.15027e-05	8.02307e-05	8.73718e-05	9.16443e-05	9.44519e-05		0.185669	2.58072e-05			0.185669	3.96709e-05			0.185669	5.08312e-05			0.185669	6.23119e-05			0.185669	6.95624e-05			0.185669	7.76875e-05			0.185669	8.48035e-05			0.185669	8.8396e-05			0.185669	9.03387e-05
0.190643	2.77374e-05	4.44885e-05	5.74036e-05	7.05566e-05	7.93762e-05	8.92944e-05	9.74426e-05	0.000102417	0.000105804		0.190643	2.75925e-05			0.190643	4.32711e-05			0.190643	5.60969e-05			0.190643	6.93913e-05			0.190643	7.78385e-05			0.190643	8.72327e-05			0.190643	9.50273e-05			0.190643	9.94168e-05			0.190643	0.000101918
0.195648	2.86285e-05	4.73328e-05	6.20422e-05	7.69348e-05	8.70667e-05	9.82361e-05	0.000107483	0.00011322	0.000117279		0.195648	2.89425e-05			0.195648	4.64813e-05			0.195648	6.10836e-05			0.195648	7.63384e-05			0.195648	8.61936e-05			0.195648	9.70606e-05			0.195648	0.000105671			0.195648	0.000111022			0.195648	0.000114249
0.200623	2.89825e-05	4.94659e-05	6.604e-05	8.27637e-05	9.43603e-05	0.000106903	0.000117371	0.000123993	0.000128754		0.200623	2.97382e-05			0.200623	4.90718e-05			0.200623	6.54792e-05			0.200623	8.27612e-05			0.200623	9.42241e-05			0.200623	0.000106758			0.200623	0.000116353			0.200623	0.000122831			0.200623	0.000126973
0.205627	2.88483e-05	5.07507e-05	6.92444e-05	8.78906e-05	0.000101044	0.000115112	0.000126923	0.000134491	0.000140106		0.205627	2.99241e-05			0.205627	5.09011e-05			0.205627	6.90808e-05			0.205627	8.84011e-05			0.205627	0.000101675			0.205627	0.000116083			0.205627	0.00012688			0.205627	0.00013467			0.205627	0.000139951
0.210632	2.82929e-05	5.1178e-05	7.14417e-05	9.20715e-05	0.000106964	0.000122681	0.000135925	0.000144531	0.000151093		0.210632	2.94785e-05			0.210632	5.18222e-05			0.210632	7.16314e-05			0.210632	9.28887e-05			0.210632	0.000108128			0.210632	0.000124577			0.210632	0.000136823			0.210632	0.000146094			0.210632	0.000152753
0.215637	2.74872e-05	5.05676e-05	7.24792e-05	9.50928e-05	0.000111847	0.000129334	0.000144196	0.000153961	0.000161652		0.215637	2.84381e-05			0.215637	5.17664e-05			0.215637	7.29559e-05			0.215637	9.59348e-05			0.215637	0.000113219			0.215637	0.000131821			0.215637	0.000145774			0.215637	0.000156673			0.215637	0.00016495
0.220612	2.65717e-05	4.90692e-05	7.22046e-05	9.67102e-05	0.000115448	0.000134888	0.000151489	0.000162506	0.000171448		0.220612	2.68966e-05			0.220612	5.07469e-05			0.220612	7.29639e-05			0.220612	9.7328e-05			0.220612	0.000116624			0.220612	0.000137395			0.220612	0.000153287			0.220612	0.000165907			0.220612	0.000176009
0.225616	2.57019e-05	4.68964e-05	7.05566e-05	9.66492e-05	0.000117523	0.00013913	0.000157593	0.000170044	0.000180359		0.225616	2.49509e-05			0.225616	4.88272e-05			0.225616	7.16553e-05			0.225616	9.69869e-05			0.225616	0.000118164			0.225616	0.000141037			0.225616	0.000159076			0.225616	0.00017347			0.225616	0.000185585
0.230621	2.49451e-05	4.43115e-05	6.76575e-05	9.48181e-05	0.000117767	0.000141571	0.00016214	0.000176178	0.000188141		0.230621	2.27389e-05			0.230621	4.61456e-05			0.230621	6.91188e-05			0.230621	9.4922e-05			0.230621	0.000117713			0.230621	0.000142487			0.230621	0.000162786			0.230621	0.00017892			0.230621	0.000193155
0.235596	2.43256e-05	4.17145e-05	6.37817e-05	9.1217e-05	0.000115936	0.00014209	0.000164825	0.000180634	0.000194397		0.235596	2.0405e-05			0.235596	4.28998e-05			0.235596	6.55521e-05			0.235596	9.1304e-05			0.235596	0.000115319			0.235596	0.000141662			0.235596	0.000164208			0.235596	0.000181948			0.235596	0.000198308
0.240601	2.3822e-05	3.93799e-05	5.93567e-05	8.59375e-05	0.000111969	0.000140289	0.000165314	0.000183014	0.000198883		0.240601	1.8036e-05			0.240601	3.92437e-05			0.240601	6.11407e-05			0.240601	8.63313e-05			0.240601	0.000111112			0.240601	0.000138606			0.240601	0.000163277			0.240601	0.000182423			0.240601	0.000200829
0.245605	2.34131e-05	3.74817e-05	5.49316e-05	7.94678e-05	0.000105926	0.000135986	0.000163238	0.000182983	0.000201233		0.245605	1.57392e-05			0.245605	3.53863e-05			0.245605	5.61602e-05			0.245605	8.03319e-05			0.245605	0.000105365			0.245605	0.000133508			0.245605	0.000160032			0.245605	0.000180292			0.245605	0.00020054
0.25058	2.30835e-05	3.6026e-05	5.09949e-05	7.25708e-05	9.8114e-05	0.000129181	0.000158295	0.000180145	0.000200989		0.25058	1.3594e-05			0.25058	3.15184e-05			0.25058	5.08959e-05			0.25058	7.36824e-05			0.25058	9.84597e-05			0.25058	0.000126715			0.25058	0.000154691			0.25058	0.000175709			0.25058	0.000197485
0.255585			4.78729e-05	6.604e-05	8.93555e-05	0.000119995	0.00015033	0.000174133	0.000197754		0.255585	1.16182e-05			0.255585	2.77316e-05			0.255585	4.5515e-05			0.255585	6.66321e-05			0.255585	9.06821e-05			0.255585	0.000118524			0.255585	0.000147479			0.255585	0.00016887			0.255585	0.000191794
0.26059			4.55536e-05	6.05774e-05	8.05969e-05	0.000109222	0.000139496	0.000164825	0.000191193		0.26059	9.84772e-06			0.26059	2.41523e-05			0.26059	4.0241e-05			0.26059	5.95145e-05			0.26059	8.24382e-05			0.26059	0.000109385			0.26059	0.000138787			0.26059	0.000160154			0.26059	0.00018378
0.265564			4.39117e-05	5.6427e-05	7.2876e-05	9.79309e-05	0.000126434	0.000152374	0.000181		0.265564	8.29772e-06			0.265564	2.08684e-05			0.265564	3.52509e-05			0.265564	5.26139e-05			0.265564	7.41129e-05			0.265564	9.97699e-05			0.265564	0.00012908			0.265564	0.000150051			0.265564	0.000173913
0.270569			4.27521e-05	5.35584e-05	6.6864e-05	8.74939e-05	0.000112457	0.000137512	0.000167267		0.270569	6.94319e-06			0.270569	1.78774e-05			0.270569	3.05832e-05			0.270569	4.60265e-05			0.270569	6.58811e-05			0.270569	8.99295e-05			0.270569	0.000118644			0.270569	0.000138882			0.270569	0.000162533
0.275574			4.18793e-05	5.15747e-05	6.25915e-05	7.901e-05	9.93652e-05	0.000121765	0.000150818		0.275574	5.7811e-06			0.275574	1.52146e-05			0.275574	2.63307e-05			0.275574	3.99204e-05			0.275574	5.80116e-05			0.275574	8.02384e-05			0.275574	0.000107916			0.275574	0.000127145			0.275574	0.000150176
0.280579			4.12262e-05	5.02319e-05	5.97229e-05	7.28455e-05	8.86536e-05	0.000107147	0.00013324		0.280579	4.79371e-06			0.280579	1.28761e-05			0.280579	2.25201e-05			0.280579	3.43679e-05			0.280579	5.06578e-05			0.280579	7.0944e-05			0.280579	9.72271e-05			0.280579	0.00011524			0.280579	0.000137305
0.285553			4.07257e-05	4.92737e-05	5.78003e-05	6.87256e-05	8.09631e-05	9.53674e-05	0.000116699		0.285553	3.96612e-06			0.285553	1.08572e-05			0.285553	1.91719e-05			0.285553	2.9428e-05			0.285553	4.39548e-05			0.285553	6.22759e-05			0.285553	8.69112e-05			0.285553	0.000103576			0.285553	0.000124413
0.290558			4.02649e-05	4.85199e-05	5.64575e-05	6.60095e-05	7.59277e-05	8.70361e-05	0.000103363		0.290558	3.2683e-06			0.290558	9.10872e-06			0.290558	1.6227e-05			0.290558	2.50366e-05			0.290558	3.78656e-05			0.290558	5.42397e-05			0.290558	7.7044e-05			0.290558	9.22774e-05			0.290558	0.000111687
0.295563			3.98346e-05	4.78851e-05	5.5481e-05	6.4209e-05	7.26929e-05	8.1665e-05	9.38721e-05		0.295563	2.687e-06			0.295563	7.61625e-06			0.295563	1.36786e-05			0.295563	2.12013e-05			0.295563	3.24427e-05			0.295563	4.69509e-05			0.295563	6.78338e-05			0.295563	8.16149e-05			0.295563	9.94798e-05
0.300537			3.94592e-05	4.73175e-05	5.4657e-05	6.28662e-05	7.05872e-05	7.82776e-05	8.77686e-05		0.300537	2.20756e-06			0.300537	6.35768e-06			0.300537	1.15033e-05			0.300537	1.79019e-05			0.300537	2.76946e-05			0.300537	4.04639e-05			0.300537	5.94179e-05			0.300537	7.17799e-05			0.300537	8.80589e-05
0.305542			3.91388e-05	4.6814e-05	5.39551e-05	6.18591e-05	6.90918e-05	7.60498e-05	8.40149e-05		0.305542	1.80862e-06			0.305542	5.28876e-06			0.305542	9.63579e-06			0.305542	1.50498e-05			0.305542	2.35244e-05			0.305542	3.4682e-05			0.305542	5.17317e-05			0.305542	6.27246e-05			0.305542	7.74116e-05

## Sheet: Sheet2
												Diam. Elec	0.5	cm
												Diam. Elec	0.005	m
												radio	0.0025
												area	1.9635e-05											Datos					Simulación
	10	20	30	40	50	60	70	80	90			10	20	30	40	50	60	70	80	90				20	40	60	80					20		40		60		80
0.000458	8.90503e-08	3.28796e-07	6.99463e-07	1.08551e-06	1.44928e-06	1.84814e-06	2.28912e-06	2.59338e-06	2.78076e-06		0.458	0.00453528	0.0167454	0.0356233	0.0552844	0.0738111	0.094125	0.116584	0.13208	0.141623			0.458	0.0167454	0.0552844	0.094125	0.13208		0.105743	3.08176e-06	105.743	0.156953	4.54816e-06	0.231635	6.15552e-06	0.313497	7.80581e-06	0.397546
0.005829	2.49085e-07	6.90002e-07	1.23718e-06	1.95679e-06	2.6471e-06	3.40637e-06	4.38232e-06	5.30762e-06	6.20544e-06		5.829	0.0126857	0.0351415	0.0630091	0.0996581	0.134815	0.173485	0.223189	0.270314	0.31604			5.829	0.0351415	0.0996581	0.173485	0.270314		0.110718	3.7181e-06	110.718	0.189361	5.46853e-06	0.278509	7.32761e-06	0.373191	9.20295e-06	0.468701
0.010803	2.68921e-07	7.05261e-07	1.25366e-06	1.98059e-06	2.67731e-06	3.43964e-06	4.4455e-06	5.35889e-06	6.26831e-06		10.803	0.013696	0.0359186	0.0638483	0.10087	0.136354	0.175179	0.226407	0.272925	0.319242			10.803	0.0359186	0.10087	0.175179	0.272925		0.115753	4.48981e-06	115.753	0.228664	6.58301e-06	0.335269	8.73393e-06	0.444814	1.08638e-05	0.553286
0.015808	2.64832e-07	7.16858e-07	1.27258e-06	2.01141e-06	2.71271e-06	3.47931e-06	4.48883e-06	5.42908e-06	6.35071e-06		15.808	0.0134877	0.0365092	0.064812	0.10244	0.138157	0.177199	0.228614	0.2765	0.323438			15.808	0.0365092	0.10244	0.177199	0.2765		0.120728	5.40064e-06	120.728	0.275052	7.8975e-06	0.402215	1.03782e-05	0.528554	1.27881e-05	0.65129
0.020813	2.7652e-07	7.24793e-07	1.28479e-06	2.02148e-06	2.72156e-06	3.51349e-06	4.52606e-06	5.4657e-06	6.40564e-06		20.813	0.014083	0.0369133	0.0654337	0.102953	0.138607	0.17894	0.23051	0.278365	0.326236			20.813	0.0369133	0.102953	0.17894	0.278365		0.125702	6.48324e-06	125.702	0.330188	9.46034e-06	0.48181	1.23172e-05	0.627307	1.50377e-05	0.765863
0.025787	2.80212e-07	7.32727e-07	1.30219e-06	2.03949e-06	2.75879e-06	3.54401e-06	4.55261e-06	5.51147e-06	6.43616e-06		25.787	0.0142711	0.0373174	0.0663196	0.10387	0.140504	0.180494	0.231862	0.280696	0.32779			25.787	0.0373174	0.10387	0.180494	0.280696		0.130707	7.7732e-06	130.707	0.395885	1.13253e-05	0.57679	1.46137e-05	0.744267	1.76801e-05	0.900436
0.030792	2.85492e-07	7.38831e-07	1.31531e-06	2.04925e-06	2.76886e-06	3.56171e-06	4.59076e-06	5.54504e-06	6.47278e-06		30.792	0.0145399	0.0376282	0.0669879	0.104367	0.141017	0.181396	0.233805	0.282406	0.329655			30.792	0.0376282	0.104367	0.181396	0.282406		0.135712	9.29317e-06	135.712	0.473296	1.35292e-05	0.689037	1.73096e-05	0.881571	2.07577e-05	1.05718
0.035797	2.92938e-07	7.44629e-07	1.32233e-06	2.06726e-06	2.79816e-06	3.58673e-06	4.62799e-06	5.56641e-06	6.5155e-06		35.797	0.0149192	0.0379235	0.0673454	0.105284	0.142509	0.18267	0.235701	0.283494	0.331831			35.797	0.0379235	0.105284	0.18267	0.283494		0.140717	1.10724e-05	140.717	0.563911	1.61214e-05	0.821055	2.04627e-05	1.04216	2.43311e-05	1.23917
0.040802	2.88483e-07	7.44629e-07	1.31867e-06	2.08923e-06	2.80945e-06	3.6145e-06	4.6286e-06	5.61829e-06	6.55518e-06		40.802	0.0146923	0.0379235	0.0671589	0.106404	0.143084	0.184085	0.235732	0.286136	0.333852			40.802	0.0379235	0.106404	0.184085	0.286136		0.145691	1.31248e-05	145.691	0.668441	1.91324e-05	0.974402	2.41096e-05	1.22789	2.84375e-05	1.44831
0.045807	3.03772e-07	7.87964e-07	1.34216e-06	2.10724e-06	2.84149e-06	3.6322e-06	4.67102e-06	5.6427e-06	6.57959e-06		45.807	0.0154709	0.0401306	0.0683556	0.107321	0.144716	0.184986	0.237893	0.28738	0.335095			45.807	0.0401306	0.107321	0.184986	0.28738		0.150696	1.54994e-05	150.696	0.789375	2.26493e-05	1.15352	2.8358e-05	1.44426	3.31948e-05	1.69059
0.050781	3.07312e-07	7.6355e-07	1.35346e-06	2.117e-06	2.86163e-06	3.66852e-06	4.70886e-06	5.67627e-06	6.62842e-06		50.781	0.0156512	0.0388872	0.0689307	0.107818	0.145741	0.186836	0.23982	0.289089	0.337582			50.781	0.0388872	0.107818	0.186836	0.289089		0.155701	1.81994e-05	155.701	0.926886	2.66997e-05	1.3598	3.3248e-05	1.6933	3.86465e-05	1.96825
0.055786	3.17688e-07	8.01697e-07	1.37665e-06	2.14966e-06	2.89215e-06	3.70087e-06	4.75159e-06	5.74036e-06	6.67114e-06		55.786	0.0161797	0.04083	0.0701119	0.109481	0.147296	0.188483	0.241996	0.292353	0.339758			55.786	0.04083	0.109481	0.188483	0.292353		0.160675	2.12074e-05	160.675	1.08008	3.12879e-05	1.59348	3.87975e-05	1.97594	4.48157e-05	2.28244
0.060791	3.36914e-07	8.01392e-07	1.40625e-06	2.19391e-06	2.93396e-06	3.75092e-06	4.79736e-06	5.78613e-06	6.72302e-06		60.791	0.0171589	0.0408144	0.0716196	0.111735	0.149425	0.191032	0.244327	0.294685	0.3424			60.791	0.0408144	0.111735	0.191032	0.294685		0.16568	2.45444e-05	165.68	1.25003	3.64882e-05	1.85832	4.51185e-05	2.29786	5.18344e-05	2.6399
0.065765	3.45764e-07	8.35266e-07	1.43768e-06	2.22107e-06	2.96936e-06	3.79303e-06	4.84619e-06	5.85327e-06	6.79626e-06		65.765	0.0176096	0.0425397	0.0732204	0.113118	0.151228	0.193177	0.246814	0.298104	0.34613			65.765	0.0425397	0.113118	0.193177	0.298104		0.170685	2.81513e-05	170.685	1.43373	4.22646e-05	2.15251	5.22017e-05	2.6586	5.97076e-05	3.04088
0.07077	3.69263e-07	8.63648e-07	1.48895e-06	2.27325e-06	3.03589e-06	3.86871e-06	4.92554e-06	5.92957e-06	6.87866e-06		70.77	0.0188064	0.0439851	0.0758316	0.115776	0.154616	0.197031	0.250855	0.30199	0.350327			70.77	0.0439851	0.115776	0.197031	0.30199		0.175659	3.19317e-05	175.659	1.62626	4.85313e-05	2.47167	5.99896e-05	3.05524	6.83965e-05	3.4834
0.075775	4.06189e-07	9.14001e-07	1.5387e-06	2.34741e-06	3.10944e-06	3.95325e-06	5.02319e-06	6.04248e-06	6.97632e-06		75.775	0.020687	0.0465496	0.078365	0.119552	0.158362	0.201337	0.255829	0.30774	0.3553			75.775	0.0465496	0.119552	0.201337	0.30774		0.180664	3.58266e-05	180.664	1.82463	5.52751e-05	2.81513	6.8533e-05	3.49035	7.79955e-05	3.97227
0.08075	4.5105e-07	9.74731e-07	1.61468e-06	2.4295e-06	3.21197e-06	4.06494e-06	5.16052e-06	6.16455e-06	7.11365e-06		80.75	0.0229717	0.0496425	0.082235	0.123733	0.163584	0.207025	0.262823	0.313957	0.362294			80.75	0.0496425	0.123733	0.207025	0.313957		0.185669	3.96709e-05	185.669	2.02042	6.23119e-05	3.17351	7.76875e-05	3.95658	8.8396e-05	4.50196
0.085754	5.19104e-07	1.05652e-06	1.69952e-06	2.54761e-06	3.34503e-06	4.22028e-06	5.32532e-06	6.32324e-06	7.2937e-06		85.754	0.0264377	0.0538079	0.0865558	0.129748	0.170361	0.214936	0.271216	0.322039	0.371464			85.754	0.0538079	0.129748	0.214936	0.322039		0.190643	4.32711e-05	190.643	2.20377	6.93913e-05	3.53406	8.72327e-05	4.44271	9.94168e-05	5.06324
0.090759	6.08826e-07	1.18042e-06	1.85211e-06	2.71698e-06	3.51959e-06	4.42169e-06	5.51758e-06	6.54907e-06	7.49817e-06		90.759	0.0310072	0.0601182	0.0943271	0.138374	0.179251	0.225194	0.281007	0.333541	0.381878			90.759	0.0601182	0.138374	0.225194	0.333541		0.195648	4.64813e-05	195.648	2.36727	7.63384e-05	3.88787	9.70606e-05	4.94324	0.000111022	5.65431
0.095734	7.29065e-07	1.3382e-06	2.04315e-06	2.94922e-06	3.77258e-06	4.6814e-06	5.82886e-06	6.85425e-06	7.82471e-06		95.734	0.0371309	0.0681536	0.104057	0.150202	0.192136	0.238421	0.296861	0.349083	0.398508			95.734	0.0681536	0.150202	0.238421	0.349083		0.200623	4.90718e-05	200.623	2.4992	8.27612e-05	4.21498	0.000106758	5.43712	0.000122831	6.25571
0.100739	9.06372e-07	1.57379e-06	2.30286e-06	3.24951e-06	4.09393e-06	5.05066e-06	6.22253e-06	7.26013e-06	8.22144e-06		100.739	0.046161	0.0801524	0.117283	0.165496	0.208502	0.257227	0.31691	0.369755	0.418713			100.739	0.0801524	0.165496	0.257227	0.369755		0.205627	5.09011e-05	205.627	2.59236	8.84011e-05	4.50222	0.000116083	5.91202	0.00013467	6.85865
0.105743	1.13739e-06	1.87225e-06	2.67548e-06	3.66242e-06	4.55322e-06	5.56335e-06	6.77185e-06	7.80945e-06	8.7616e-06		105.743	0.0579267	0.0953528	0.136261	0.186525	0.231893	0.283339	0.344887	0.397731	0.446223			105.743	0.0953528	0.186525	0.283339	0.397731		0.210632	5.18222e-05	210.632	2.63928	9.28887e-05	4.73077	0.000124577	6.34462	0.000146094	7.44047
0.110718	1.45386e-06	2.2934e-06	3.15094e-06	4.2337e-06	5.16968e-06	6.24695e-06	7.50732e-06	8.53882e-06	9.49402e-06		110.718	0.0740442	0.116801	0.160476	0.21562	0.263289	0.318154	0.382344	0.434877	0.483525			110.718	0.116801	0.21562	0.318154	0.434877		0.215637	5.17664e-05	215.637	2.63644	9.59348e-05	4.88591	0.000131821	6.71359	0.000156673	7.97928
0.115753	1.88507e-06	2.85004e-06	3.83148e-06	4.99268e-06	5.98755e-06	7.15942e-06	8.45947e-06	9.52759e-06	1.04767e-05		115.753	0.0960057	0.145151	0.195135	0.254274	0.304943	0.364626	0.430836	0.485235	0.533572			115.753	0.145151	0.254274	0.364626	0.485235		0.220612	5.07469e-05	220.612	2.58451	9.7328e-05	4.95686	0.000137395	6.99745	0.000165907	8.44957
0.120728	2.4585e-06	3.60809e-06	4.71191e-06	6.01196e-06	7.08923e-06	8.37402e-06	9.76257e-06	1.08276e-05	1.17889e-05		120.728	0.12521	0.183758	0.239975	0.306186	0.361051	0.426484	0.497203	0.551446	0.600404			120.728	0.183758	0.306186	0.426484	0.551446		0.225616	4.88272e-05	225.616	2.48675	9.69869e-05	4.93949	0.000141037	7.18296	0.00017347	8.83475
0.125702	3.19946e-06	4.599e-06	5.87463e-06	7.36694e-06	8.54492e-06	9.9884e-06	1.14533e-05	1.2558e-05	1.3504e-05		125.702	0.162947	0.234225	0.299192	0.375194	0.435188	0.508704	0.583308	0.639571	0.687753			125.702	0.234225	0.375194	0.508704	0.639571		0.230621	4.61456e-05	230.621	2.35017	9.4922e-05	4.83433	0.000142487	7.25678	0.00017892	9.11228
0.130707	4.1571e-06	5.88074e-06	7.35169e-06	9.10644e-06	1.04279e-05	1.20667e-05	1.36566e-05	1.47827e-05	1.57318e-05		130.707	0.211719	0.299503	0.374417	0.463786	0.531085	0.614548	0.695524	0.752875	0.801213			130.707	0.299503	0.463786	0.614548	0.752875		0.235596	4.28998e-05	235.596	2.18486	9.1304e-05	4.65006	0.000141662	7.21478	0.000181948	9.26652
0.135712	5.34363e-06	7.47681e-06	9.26514e-06	1.1319e-05	1.28143e-05	1.47186e-05	1.64856e-05	1.76544e-05	1.85913e-05		135.712	0.272148	0.38079	0.471868	0.576469	0.652627	0.749612	0.839603	0.89913	0.946845			135.712	0.38079	0.576469	0.749612	0.89913		0.240601	3.92437e-05	240.601	1.99866	8.63313e-05	4.39681	0.000138606	7.05914	0.000182423	9.2907
0.140717	6.79016e-06	9.4574e-06	1.16364e-05	1.40869e-05	1.58173e-05	1.80389e-05	2.00104e-05	2.12555e-05	2.22046e-05		140.717	0.345819	0.48166	0.592633	0.717439	0.805565	0.918714	1.01912	1.08253	1.13087			140.717	0.48166	0.717439	0.918714	1.08253		0.245605	3.53863e-05	245.605	1.8022	8.03319e-05	4.09126	0.000133508	6.79949	0.000180292	9.18216
0.145691	8.50525e-06	1.18469e-05	1.45081e-05	1.74561e-05	1.94733e-05	2.20856e-05	2.43195e-05	2.56897e-05	2.66449e-05		145.691	0.433168	0.603357	0.738888	0.889027	0.991763	1.12481	1.23858	1.30836	1.35701			145.691	0.603357	0.889027	1.12481	1.30836		0.25058	3.15184e-05	250.58	1.60521	7.36824e-05	3.75261	0.000126715	6.45352	0.000175709	8.94874
0.150696	1.04797e-05	1.46637e-05	1.79138e-05	2.14722e-05	2.38525e-05	2.6947e-05	2.95075e-05	3.10059e-05	3.20282e-05		150.696	0.533728	0.746814	0.912341	1.09357	1.2148	1.3724	1.5028	1.57911	1.63118			150.696	0.746814	1.09357	1.3724	1.57911		0.255585	2.77316e-05	255.585	1.41236	6.66321e-05	3.39354	0.000118524	6.03635	0.00016887	8.60047
0.155701	1.26739e-05	1.78589e-05	2.18384e-05	2.61383e-05	2.89734e-05	3.26141e-05	3.55682e-05	3.73016e-05	3.84094e-05		155.701	0.645477	0.909544	1.11222	1.33121	1.4756	1.66102	1.81147	1.89975	1.95617			155.701	0.909544	1.33121	1.66102	1.89975		0.26059	2.41523e-05	260.59	1.23006	5.95145e-05	3.03104	0.000109385	5.57092	0.000160154	8.15657
0.160675	1.50482e-05	2.14203e-05	2.62482e-05	3.14209e-05	3.48023e-05	3.91052e-05	4.25476e-05	4.44916e-05	4.57153e-05		160.675	0.766398	1.09092	1.33681	1.60025	1.77246	1.99161	2.16693	2.26593	2.32826			160.675	1.09092	1.60025	1.99161	2.26593		0.265564	2.08684e-05	265.564	1.06282	5.26139e-05	2.6796	9.97699e-05	5.08123	0.000150051	7.64201
0.16568	1.7514e-05	2.5238e-05	3.10669e-05	3.73047e-05	4.13178e-05	4.62952e-05	5.02624e-05	5.25513e-05	5.39856e-05		165.68	0.891981	1.28536	1.58222	1.89991	2.10429	2.35779	2.55984	2.67641	2.74946			165.68	1.28536	1.89991	2.35779	2.67641		0.270569	1.78774e-05	270.569	0.910484	4.60265e-05	2.3441	8.99295e-05	4.58006	0.000138882	7.07318
0.170685	1.99951e-05	2.92389e-05	3.62701e-05	4.35944e-05	4.83459e-05	5.41382e-05	5.87769e-05	6.14319e-05	6.30798e-05		170.685	1.01834	1.48912	1.84722	2.22024	2.46223	2.75723	2.99347	3.12869	3.21262			170.685	1.48912	2.22024	2.75723	3.12869		0.275574	1.52146e-05	275.574	0.77487	3.99204e-05	2.03312	8.02384e-05	4.0865	0.000127145	6.47544
0.175659	2.23511e-05	3.33099e-05	4.16199e-05	5.02014e-05	5.58167e-05	6.24695e-05	6.78711e-05	7.09839e-05	7.2937e-05		175.659	1.13833	1.69646	2.11968	2.55673	2.84271	3.18154	3.45664	3.61517	3.71464			175.659	1.69646	2.55673	3.18154	3.61517		0.280579	1.28761e-05	280.579	0.655772	3.43679e-05	1.75034	7.0944e-05	3.61314	0.00011524	5.86911
0.180664	2.45026e-05	3.73444e-05	4.70367e-05	5.70068e-05	6.35986e-05	7.1228e-05	7.74536e-05	8.10852e-05	8.34351e-05		180.664	1.2479	1.90193	2.39556	2.90333	3.23904	3.62761	3.94467	4.12963	4.2493			180.664	1.90193	2.90333	3.62761	4.12963		0.285553	1.08572e-05	285.553	0.55295	2.9428e-05	1.49875	6.22759e-05	3.17168	0.000103576	5.27509
0.185669	2.63397e-05	4.11072e-05	5.23682e-05	6.38428e-05	7.15027e-05	8.02307e-05	8.73718e-05	9.16443e-05	9.44519e-05		185.669	1.34147	2.09357	2.66708	3.25148	3.64159	4.08611	4.4498	4.66739	4.81038			185.669	2.09357	3.25148	4.08611	4.66739		0.290558	9.10872e-06	290.558	0.463902	2.50366e-05	1.2751	5.42397e-05	2.7624	9.22774e-05	4.69964
0.190643	2.77374e-05	4.44885e-05	5.74036e-05	7.05566e-05	7.93762e-05	8.92944e-05	9.74426e-05	0.000102417	0.000105804		190.643	1.41265	2.26578	2.92353	3.59341	4.04259	4.54772	4.9627	5.21604	5.38856			190.643	2.26578	3.59341	4.54772	5.21604		0.295563	7.61625e-06	295.563	0.387892	2.12013e-05	1.07977	4.69509e-05	2.39119	8.16149e-05	4.1566
0.195648	2.86285e-05	4.73328e-05	6.20422e-05	7.69348e-05	8.70667e-05	9.82361e-05	0.000107483	0.00011322	0.000117279		195.648	1.45804	2.41063	3.15978	3.91825	4.43426	5.00311	5.47405	5.76624	5.97296			195.648	2.41063	3.91825	5.00311	5.76624		0.300537	6.35768e-06	300.537	0.323793	1.79019e-05	0.911733	4.04639e-05	2.06081	7.17799e-05	3.65571
0.200623	2.89825e-05	4.94659e-05	6.604e-05	8.27637e-05	9.43603e-05	0.000106903	0.000117371	0.000123993	0.000128754		200.623	1.47607	2.51927	3.36338	4.21511	4.80572	5.44452	5.97762	6.31489	6.55736			200.623	2.51927	4.21511	5.44452	6.31489		0.305542	5.28876e-06	305.542	0.269354	1.50498e-05	0.766481	3.4682e-05	1.76633	6.27246e-05	3.19453
0.205627	2.88483e-05	5.07507e-05	6.92444e-05	8.78906e-05	0.000101044	0.000115112	0.000126923	0.000134491	0.000140106		205.627	1.46923	2.58471	3.52658	4.47622	5.1461	5.86261	6.4641	6.84955	7.13553			205.627	2.58471	4.47622	5.86261	6.84955
0.210632	2.82929e-05	5.1178e-05	7.14417e-05	9.20715e-05	0.000106964	0.000122681	0.000135925	0.000144531	0.000151093		210.632	1.44094	2.60647	3.63848	4.68915	5.44762	6.24806	6.9226	7.3609	7.69506			210.632	2.60647	4.68915	6.24806	7.3609
0.215637	2.74872e-05	5.05676e-05	7.24792e-05	9.50928e-05	0.000111847	0.000129334	0.000144196	0.000153961	0.000161652		215.637	1.39991	2.57538	3.69133	4.84302	5.6963	6.58689	7.3438	7.84116	8.23283			215.637	2.57538	4.84302	6.58689	7.84116
0.220612	2.65717e-05	4.90692e-05	7.22046e-05	9.67102e-05	0.000115448	0.000134888	0.000151489	0.000162506	0.000171448		220.612	1.35328	2.49907	3.67734	4.9254	5.8797	6.86976	7.71527	8.27635	8.73174			220.612	2.49907	4.9254	6.86976	8.27635
0.225616	2.57019e-05	4.68964e-05	7.05566e-05	9.66492e-05	0.000117523	0.00013913	0.000157593	0.000170044	0.000180359		225.616	1.30898	2.38841	3.59341	4.92229	5.98539	7.0858	8.02612	8.66024	9.18558			225.616	2.38841	4.92229	7.0858	8.66024
0.230621	2.49451e-05	4.43115e-05	6.76575e-05	9.48181e-05	0.000117767	0.000141571	0.00016214	0.000176178	0.000188141		230.621	1.27044	2.25676	3.44576	4.82904	5.99783	7.21013	8.2577	8.97265	9.58191			230.621	2.25676	4.82904	7.21013	8.97265
0.235596	2.43256e-05	4.17145e-05	6.37817e-05	9.1217e-05	0.000115936	0.00014209	0.000164825	0.000180634	0.000194397		235.596	1.23889	2.1245	3.24837	4.64563	5.90457	7.23656	8.39447	9.19957	9.90053			235.596	2.1245	4.64563	7.23656	9.19957
0.240601	2.3822e-05	3.93799e-05	5.93567e-05	8.59375e-05	0.000111969	0.000140289	0.000165314	0.000183014	0.000198883		240.601	1.21324	2.0056	3.023	4.37675	5.70252	7.14486	8.41934	9.3208	10.129			240.601	2.0056	4.37675	7.14486	9.3208
0.245605	2.34131e-05	3.74817e-05	5.49316e-05	7.94678e-05	0.000105926	0.000135986	0.000163238	0.000182983	0.000201233		245.605	1.19242	1.90892	2.79764	4.04725	5.39478	6.92571	8.31365	9.31925	10.2487			245.605	1.90892	4.04725	6.92571	9.31925
0.25058	2.30835e-05	3.6026e-05	5.09949e-05	7.25708e-05	9.8114e-05	0.000129181	0.000158295	0.000180145	0.000200989		250.58	1.17563	1.83478	2.59714	3.69599	4.99689	6.57911	8.06186	9.1747	10.2363			250.58	1.83478	3.69599	6.57911	9.1747
0.255585	2.27966e-05	3.49548e-05	4.78729e-05	6.604e-05	8.93555e-05	0.000119995	0.00015033	0.000174133	0.000197754		255.585	1.16102	1.78023	2.43814	3.36338	4.55083	6.11129	7.65621	8.86852	10.0715			255.585	1.78023	3.36338	6.11129	8.86852
0.26059	2.25617e-05	3.41614e-05	4.55536e-05	6.05774e-05	8.05969e-05	0.000109222	0.000139496	0.000164825	0.000191193		260.59	1.14905	1.73982	2.32002	3.08517	4.10476	5.56264	7.10445	8.39447	9.73734			260.59	1.73982	3.08517	5.56264	8.39447
0.265564	2.23572e-05	3.35541e-05	4.39117e-05	5.6427e-05	7.2876e-05	9.79309e-05	0.000126434	0.000152374	0.000181		265.564	1.13864	1.70889	2.2364	2.8738	3.71153	4.98757	6.43923	7.76034	9.21822			265.564	1.70889	2.8738	4.98757	7.76034
0.270569	2.2168e-05	3.30719e-05	4.27521e-05	5.35584e-05	6.6864e-05	8.74939e-05	0.000112457	0.000137512	0.000167267		270.569	1.129	1.68433	2.17734	2.7277	3.40535	4.45602	5.72739	7.00342	8.51881			270.569	1.68433	2.7277	4.45602	7.00342
0.275574	2.20093e-05	3.26691e-05	4.18793e-05	5.15747e-05	6.25915e-05	7.901e-05	9.93652e-05	0.000121765	0.000150818		275.574	1.12092	1.66382	2.13289	2.62667	3.18775	4.02394	5.06062	6.20143	7.68107			275.574	1.66382	2.62667	4.02394	6.20143
0.280579	2.18689e-05	3.23181e-05	4.12262e-05	5.02319e-05	5.97229e-05	7.28455e-05	8.86536e-05	0.000107147	0.00013324		280.579	1.11377	1.64594	2.09963	2.55829	3.04166	3.70998	4.51508	5.45695	6.78583			280.579	1.64594	2.55829	3.70998	5.45695
0.285553	2.17316e-05	3.20343e-05	4.07257e-05	4.92737e-05	5.78003e-05	6.87256e-05	8.09631e-05	9.53674e-05	0.000116699		285.553	1.10678	1.63149	2.07414	2.50948	2.94374	3.50016	4.12341	4.85701	5.94343			285.553	1.63149	2.50948	3.50016	4.85701
0.290558	2.16003e-05	3.17719e-05	4.02649e-05	4.85199e-05	5.64575e-05	6.60095e-05	7.59277e-05	8.70361e-05	0.000103363		290.558	1.10009	1.61812	2.05067	2.47109	2.87535	3.36183	3.86696	4.4327	5.26422			290.558	1.61812	2.47109	3.36183	4.4327
0.295563	2.1463e-05	3.15002e-05	3.98346e-05	4.78851e-05	5.5481e-05	6.4209e-05	7.26929e-05	8.1665e-05	9.38721e-05		295.563	1.0931	1.60429	2.02875	2.43876	2.82562	3.27013	3.70221	4.15916	4.78085			295.563	1.60429	2.43876	3.27013	4.15916
0.300537	2.13409e-05	3.12622e-05	3.94592e-05	4.73175e-05	5.4657e-05	6.28662e-05	7.05872e-05	7.82776e-05	8.77686e-05		300.537	1.08688	1.59217	2.00964	2.40985	2.78365	3.20174	3.59497	3.98664	4.47001			300.537	1.59217	2.40985	3.20174	3.98664
0.305542	2.12128e-05	3.10272e-05	3.91388e-05	4.6814e-05	5.39551e-05	6.18591e-05	6.90918e-05	7.60498e-05	8.40149e-05		305.542	1.08035	1.5802	1.99332	2.38421	2.7479	3.15045	3.51881	3.87318	4.27883			305.542	1.5802	2.38421	3.15045	3.87318
0.310547	2.10693e-05	3.07983e-05	3.88123e-05	4.63501e-05	5.33447e-05	6.09741e-05	6.78711e-05	7.44019e-05	8.15125e-05		310.547	1.07305	1.56854	1.97669	2.36059	2.71682	3.10538	3.45664	3.78925	4.15139			310.547	1.56854	2.36059	3.10538	3.78925
0.315521	2.09228e-05	3.05786e-05	3.84674e-05	4.58862e-05	5.27344e-05	6.01807e-05	6.6864e-05	7.31201e-05	7.97119e-05		315.521	1.06559	1.55735	1.95912	2.33696	2.68573	3.06497	3.40535	3.72397	4.05968			315.521	1.55735	2.33696	3.06497	3.72397
0.320526	2.07764e-05	3.03375e-05	3.815e-05	4.54498e-05	5.21851e-05	5.94788e-05	6.5918e-05	7.20215e-05	7.83081e-05		320.526	1.05813	1.54507	1.94296	2.31474	2.65776	3.02922	3.35717	3.66802	3.98819			320.526	1.54507	2.31474	3.02922	3.66802
0.325531	2.06055e-05	3.01025e-05	3.78204e-05	4.50256e-05	5.16663e-05	5.87769e-05	6.50635e-05	7.10144e-05	7.70569e-05		325.531	1.04943	1.53311	1.92617	2.29313	2.63133	2.99347	3.31365	3.61673	3.92447			325.531	1.53311	2.29313	2.99347	3.61673
0.330505	2.04529e-05	2.98614e-05	3.75092e-05	4.46075e-05	5.11169e-05	5.8136e-05	6.43005e-05	7.00989e-05	7.59582e-05		330.505	1.04165	1.52083	1.91032	2.27184	2.60336	2.96083	3.27479	3.5701	3.86851			330.505	1.52083	2.27184	2.96083	3.5701
0.33551	2.0282e-05	2.96204e-05	3.71918e-05	4.41864e-05	5.05981e-05	5.74951e-05	6.35071e-05	6.92444e-05	7.49817e-05		335.51	1.03295	1.50855	1.89416	2.25039	2.57694	2.9282	3.23438	3.52658	3.81878			335.51	1.50855	2.25039	2.9282	3.52658
0.340515	2.0108e-05	2.93549e-05	3.685e-05	4.37622e-05	5.00793e-05	5.68542e-05	6.27747e-05	6.84204e-05	7.39746e-05		340.515	1.02409	1.49503	1.87675	2.22879	2.55051	2.89556	3.19708	3.48461	3.76749			340.515	1.49503	2.22879	2.89556	3.48461
0.34549	1.99219e-05	2.90985e-05	3.65112e-05	4.3338e-05	4.96185e-05	5.62439e-05	6.20727e-05	6.75964e-05	7.30896e-05		345.49	1.01461	1.48197	1.8595	2.20718	2.52705	2.86447	3.16133	3.44265	3.72241			345.49	1.48197	2.20718	2.86447	3.44265
0.350494	1.97296e-05	2.88391e-05	3.61603e-05	4.29138e-05	4.91058e-05	5.56641e-05	6.13708e-05	6.68335e-05	7.22046e-05		350.494	1.00482	1.46876	1.84162	2.18558	2.50093	2.83494	3.12558	3.40379	3.67734			350.494	1.46876	2.18558	2.83494	3.40379
0.355499	1.95374e-05	2.85614e-05	3.58093e-05	4.24866e-05	4.86053e-05	5.50537e-05	6.0669e-05	6.604e-05	7.13501e-05		355.499	0.995027	1.45462	1.82375	2.16382	2.47544	2.80386	3.08984	3.36338	3.63382			355.499	1.45462	2.16382	2.80386	3.36338
0.360474	1.93329e-05	2.83051e-05	3.54767e-05	4.20746e-05	4.8114e-05	5.44739e-05	5.99976e-05	6.53076e-05	7.05261e-05		360.474	0.984614	1.44156	1.80681	2.14284	2.45042	2.77433	3.05564	3.32608	3.59186			360.474	1.44156	2.14284	2.77433	3.32608
0.365479	1.91376e-05	2.8009e-05	3.5141e-05	4.16534e-05	4.76196e-05	5.3894e-05	5.93262e-05	6.45447e-05	6.97022e-05		365.479	0.974666	1.42648	1.78971	2.12139	2.42524	2.74479	3.02145	3.28723	3.54989			365.479	1.42648	2.12139	2.74479	3.28723
0.370483	1.89423e-05	2.77161e-05	3.47595e-05	4.12201e-05	4.71191e-05	5.33142e-05	5.86548e-05	6.38428e-05	6.89087e-05		370.483	0.964719	1.41156	1.77028	2.09932	2.39975	2.71526	2.98726	3.25148	3.50948			370.483	1.41156	2.09932	2.71526	3.25148
0.375458	1.87408e-05	2.74262e-05	3.44147e-05	4.08051e-05	4.66248e-05	5.27344e-05	5.79834e-05	6.31103e-05	6.80847e-05		375.458	0.954461	1.3968	1.75272	2.07818	2.37457	2.68573	2.95306	3.21418	3.46752			375.458	1.3968	2.07818	2.68573	3.21418
0.380463	1.85364e-05	2.71393e-05	3.40393e-05	4.03473e-05	4.61273e-05	5.21545e-05	5.73425e-05	6.23779e-05	6.72913e-05		380.463	0.944048	1.38219	1.7336	2.05487	2.34924	2.6562	2.92042	3.17687	3.42711			380.463	1.38219	2.05487	2.6562	3.17687
0.385468	1.83411e-05	2.68372e-05	3.36761e-05	3.99323e-05	4.56268e-05	5.15747e-05	5.66711e-05	6.16455e-05	6.64978e-05		385.468	0.9341	1.3668	1.71511	2.03373	2.32375	2.62667	2.88623	3.13957	3.3867			385.468	1.3668	2.03373	2.62667	3.13957
0.390472	1.81335e-05	2.65259e-05	3.32916e-05	3.94714e-05	4.51294e-05	5.09644e-05	5.60303e-05	6.09436e-05	6.57044e-05		390.472	0.923531	1.35095	1.69552	2.01026	2.29842	2.59559	2.85359	3.10382	3.34629			390.472	1.35095	2.01026	2.59559	3.10382
0.395447	1.79352e-05	2.62268e-05	3.29346e-05	3.90472e-05	4.46228e-05	5.03845e-05	5.53589e-05	6.02417e-05	6.49414e-05		395.447	0.913429	1.33572	1.67734	1.98865	2.27262	2.56606	2.8194	3.06808	3.30743			395.447	1.33572	1.98865	2.56606	3.06808
0.400421	1.7746e-05	2.55188e-05	2.98645e-05	3.37585e-05	3.72986e-05	4.08691e-05	4.3277e-05	4.60236e-05	4.92249e-05		400.421	0.903793	1.29966	1.52098	1.7193	1.8996	2.08144	2.20407	2.34396	2.507			400.421	1.29966	1.7193	2.08144	2.34396
0.395782	1.59638e-05	2.23389e-05	2.69653e-05	3.05817e-05	3.37647e-05	3.69965e-05	3.89069e-05	4.09851e-05	4.30664e-05		395.782	0.813025	1.13771	1.37333	1.55751	1.71962	1.88421	1.98151	2.08735	2.19335			395.782	1.13771	1.55751	1.88421	2.08735
0.390747	1.53473e-05	2.13165e-05	2.56348e-05	2.89764e-05	3.19031e-05	3.48236e-05	3.65173e-05	3.83514e-05	4.01123e-05		390.747	0.781629	1.08564	1.30557	1.47575	1.62481	1.77355	1.85981	1.95322	2.0429			390.747	1.08564	1.47575	1.77355	1.95322
0.385773	1.48193e-05	2.04773e-05	2.453e-05	2.7655e-05	3.0365e-05	3.3075e-05	3.45825e-05	3.62427e-05	3.77899e-05		385.773	0.754741	1.0429	1.2493	1.40846	1.54647	1.68449	1.76127	1.84582	1.92462			385.773	1.0429	1.40846	1.68449	1.84582
0.380768	1.43616e-05	1.97418e-05	2.35596e-05	2.65106e-05	2.90192e-05	3.15643e-05	3.29163e-05	3.44086e-05	3.57788e-05		380.768	0.731427	1.00544	1.19988	1.35017	1.47793	1.60755	1.67641	1.75241	1.8222			380.768	1.00544	1.35017	1.60755	1.75241
0.375763	1.39404e-05	1.90552e-05	2.2699e-05	2.547e-05	2.78168e-05	3.02032e-05	3.14148e-05	3.27759e-05	3.39996e-05		375.763	0.709979	0.97047	1.15605	1.29717	1.41669	1.53824	1.59994	1.66926	1.73158			375.763	0.97047	1.29717	1.53824	1.66926
0.370758	1.35468e-05	1.84265e-05	2.18903e-05	2.44995e-05	2.67212e-05	2.89459e-05	3.00385e-05	3.12805e-05	3.23791e-05		370.758	0.689929	0.938452	1.11486	1.24775	1.3609	1.4742	1.52984	1.5931	1.64905			370.758	0.938452	1.24775	1.4742	1.5931
0.365784	1.31744e-05	1.78528e-05	2.11365e-05	2.36084e-05	2.56897e-05	2.77832e-05	2.87689e-05	2.98859e-05	3.08868e-05		365.784	0.670967	0.909232	1.07647	1.20236	1.30836	1.41498	1.46519	1.52207	1.57305			365.784	0.909232	1.20236	1.41498	1.52207
0.360779	1.28204e-05	1.72882e-05	2.04102e-05	2.27661e-05	2.47223e-05	2.66907e-05	2.75818e-05	2.86041e-05	2.948e-05		360.779	0.652938	0.880479	1.03948	1.15947	1.25909	1.35934	1.40473	1.45679	1.5014			360.779	0.880479	1.15947	1.35934	1.45679
0.355774	1.24786e-05	1.67664e-05	1.97418e-05	2.19727e-05	2.37885e-05	2.56409e-05	2.64496e-05	2.73773e-05	2.81738e-05		355.774	0.63553	0.853902	1.00544	1.11906	1.21153	1.30588	1.34706	1.39431	1.43488			355.774	0.853902	1.11906	1.30588	1.39431
0.3508	1.2146e-05	1.62628e-05	1.90948e-05	2.11883e-05	2.29004e-05	2.46429e-05	2.53693e-05	2.62207e-05	2.69104e-05		350.8	0.618589	0.828257	0.97249	1.07911	1.1663	1.25505	1.29204	1.33541	1.37053			350.8	0.828257	1.07911	1.25505	1.33541
0.345795	1.18378e-05	1.57532e-05	1.84723e-05	2.04559e-05	2.20642e-05	2.36725e-05	2.43103e-05	2.50915e-05	2.56836e-05		345.795	0.602891	0.8023	0.940784	1.04181	1.12372	1.20563	1.23811	1.2779	1.30805			345.795	0.8023	1.04181	1.20563	1.2779
0.34079	1.15204e-05	1.52588e-05	1.78528e-05	1.97296e-05	2.1228e-05	2.2757e-05	2.33002e-05	2.39838e-05	2.45239e-05		340.79	0.586727	0.777122	0.909232	1.00482	1.08113	1.159	1.18667	1.22148	1.24899			340.79	0.777122	1.00482	1.159	1.22148
0.335815	1.12183e-05	1.4801e-05	1.72577e-05	1.90247e-05	2.04254e-05	2.18506e-05	2.23175e-05	2.29279e-05	2.33612e-05		335.815	0.57134	0.753809	0.878925	0.968916	1.04026	1.11284	1.13662	1.1677	1.18977			335.815	0.753809	0.968916	1.11284	1.1677
0.330811	1.09131e-05	1.43677e-05	1.66809e-05	1.83472e-05	1.96442e-05	2.09503e-05	2.13501e-05	2.18719e-05	2.22504e-05		330.811	0.555798	0.731738	0.84955	0.934412	1.00047	1.06699	1.08735	1.11393	1.1332			330.811	0.731738	0.934412	1.06699	1.11393
0.325806	1.06232e-05	1.39069e-05	1.6098e-05	1.76453e-05	1.88629e-05	2.00928e-05	2.0398e-05	2.08527e-05	2.11639e-05		325.806	0.541032	0.708269	0.819864	0.898664	0.960678	1.02331	1.03886	1.06201	1.07787			325.806	0.708269	0.898664	1.02331	1.06201
0.320801	1.0318e-05	1.34735e-05	1.55487e-05	1.69922e-05	1.81122e-05	1.92291e-05	1.94763e-05	1.98731e-05	2.00745e-05		320.801	0.52549	0.686199	0.791887	0.865403	0.922444	0.979329	0.991919	1.01212	1.02238			320.801	0.686199	0.865403	0.979329	1.01212
0.315826	1.00281e-05	1.30341e-05	1.50055e-05	1.63605e-05	1.73614e-05	1.83807e-05	1.85547e-05	1.88751e-05	1.90247e-05		315.826	0.510725	0.663818	0.764222	0.83323	0.884209	0.936121	0.94498	0.9613	0.968916			315.826	0.663818	0.83323	0.936121	0.9613
0.310822	9.74426e-06	1.26129e-05	1.44531e-05	1.57013e-05	1.66351e-05	1.75659e-05	1.76605e-05	1.79077e-05	1.79626e-05		310.822	0.49627	0.642369	0.73609	0.799658	0.847218	0.894623	0.899441	0.91203	0.914828			310.822	0.642369	0.799658	0.894623	0.91203
0.305817	9.44824e-06	1.21887e-05	1.39191e-05	1.50848e-05	1.59119e-05	1.67572e-05	1.67877e-05	1.69556e-05	1.69495e-05		305.817	0.481194	0.620765	0.708891	0.768263	0.810383	0.853435	0.85499	0.863538	0.863227			305.817	0.620765	0.768263	0.853435	0.863538
0.300842	9.17664e-06	1.17798e-05	1.34033e-05	1.44653e-05	1.52191e-05	1.59821e-05	1.5918e-05	1.60217e-05	1.59454e-05		300.842	0.467361	0.599938	0.682624	0.736711	0.775102	0.813958	0.810694	0.815978	0.812092			300.842	0.599938	0.736711	0.813958	0.815978
0.295837	8.89282e-06	1.13586e-05	1.28784e-05	1.38641e-05	1.45294e-05	1.51978e-05	1.5094e-05	1.51367e-05	1.49902e-05		295.837	0.452907	0.578489	0.655891	0.706093	0.739976	0.774013	0.768729	0.770905	0.763444			295.837	0.578489	0.706093	0.774013	0.770905
0.290833	8.62427e-06	1.09772e-05	1.2381e-05	1.32812e-05	1.38641e-05	1.44562e-05	1.42792e-05	1.42364e-05	1.40198e-05		290.833	0.439229	0.559061	0.630557	0.676407	0.706093	0.736245	0.72723	0.725055	0.71402			290.833	0.559061	0.676407	0.736245	0.725055
0.285828	8.34961e-06	1.05896e-05	1.18866e-05	1.26984e-05	1.3208e-05	1.37177e-05	1.34674e-05	1.33759e-05	1.30829e-05		285.828	0.425241	0.539323	0.605378	0.646721	0.672677	0.698633	0.685888	0.681225	0.666305			285.828	0.539323	0.646721	0.698633	0.681225
0.280853	8.08105e-06	1.02051e-05	1.14136e-05	1.21521e-05	1.25763e-05	1.30066e-05	1.26953e-05	1.25305e-05	1.21857e-05		280.853	0.411564	0.519739	0.581287	0.6189	0.640504	0.662419	0.646565	0.638173	0.62061			280.853	0.519739	0.6189	0.662419	0.638173
0.275848	7.8125e-06	9.83276e-06	1.09711e-05	1.15997e-05	1.19507e-05	1.22955e-05	1.19263e-05	1.17096e-05	1.12885e-05		275.848	0.397886	0.500777	0.558751	0.590768	0.608642	0.626205	0.607399	0.596363	0.574915			275.848	0.500777	0.590768	0.626205	0.596363
0.270844	7.547e-06	9.45435e-06	1.05042e-05	1.10474e-05	1.13281e-05	1.1615e-05	1.11877e-05	1.09222e-05	1.04584e-05		270.844	0.384365	0.481505	0.534971	0.562636	0.576936	0.591545	0.569786	0.556264	0.532639			270.844	0.481505	0.562636	0.591545	0.556264
0.265839	7.28149e-06	9.09119e-06	1.0022e-05	1.05255e-05	1.07361e-05	1.09528e-05	1.04736e-05	1.01349e-05	9.60999e-06		265.839	0.370843	0.463009	0.510414	0.536059	0.546783	0.557818	0.533416	0.516165	0.489431			265.839	0.463009	0.536059	0.557818	0.516165
0.260864	7.01904e-06	8.71582e-06	9.56726e-06	9.99756e-06	1.01288e-05	1.02966e-05	9.73816e-06	9.3811e-06	8.76465e-06		260.864	0.357476	0.443892	0.487255	0.50917	0.515853	0.524402	0.495959	0.477775	0.446379			260.864	0.443892	0.50917	0.524402	0.477775
0.255859	6.74744e-06	8.35266e-06	9.11865e-06	9.48792e-06	9.56726e-06	9.63745e-06	9.04846e-06	8.5968e-06	7.96814e-06		255.859	0.343643	0.425397	0.464408	0.483214	0.487255	0.49083	0.460833	0.437831	0.405813			255.859	0.425397	0.483214	0.49083	0.437831
0.250854	6.49414e-06	7.9895e-06	8.68225e-06	8.95386e-06	8.97217e-06	8.99353e-06	8.34045e-06	7.85828e-06	7.17468e-06		250.854	0.330743	0.406901	0.442182	0.456015	0.456948	0.458036	0.424775	0.400218	0.365403			250.854	0.406901	0.456015	0.458036	0.400218
0.24588	6.22559e-06	7.62329e-06	8.21838e-06	8.42285e-06	8.39539e-06	8.3374e-06	7.6355e-06	7.10449e-06	6.35986e-06		245.88	0.317066	0.38825	0.418558	0.428971	0.427572	0.424619	0.388872	0.361828	0.323904			245.88	0.38825	0.428971	0.424619	0.361828
0.240875	5.95093e-06	7.24487e-06	7.76672e-06	7.9071e-06	7.78809e-06	7.68127e-06	6.91223e-06	6.3324e-06	5.55115e-06		240.875	0.303078	0.368977	0.395555	0.402705	0.396643	0.391203	0.352036	0.322506	0.282717			240.875	0.368977	0.402705	0.391203	0.322506
0.23587	5.68848e-06	6.86035e-06	7.2937e-06	7.36389e-06	7.18994e-06	6.98853e-06	6.18286e-06	5.55725e-06	4.72717e-06		235.87	0.289711	0.349394	0.371464	0.375039	0.36618	0.355922	0.31489	0.283028	0.240752			235.87	0.349394	0.375039	0.355922	0.283028
0.230865	5.39551e-06	6.46362e-06	6.81763e-06	6.79932e-06	6.55212e-06	6.30493e-06	5.44128e-06	4.7699e-06	3.89099e-06		230.865	0.27479	0.329189	0.347218	0.346286	0.333696	0.321107	0.277122	0.242928	0.198166			230.865	0.329189	0.346286	0.321107	0.242928
0.225891	5.10864e-06	6.073e-06	6.32324e-06	6.23779e-06	5.92651e-06	5.58777e-06	4.69971e-06	3.95813e-06	3.06702e-06		225.891	0.26018	0.309295	0.322039	0.317687	0.301834	0.284582	0.239354	0.201585	0.156202			225.891	0.309295	0.317687	0.284582	0.201585
0.220886	4.80957e-06	5.65186e-06	5.82581e-06	5.65491e-06	5.27344e-06	4.8584e-06	3.91235e-06	3.13721e-06	2.20642e-06		220.886	0.244949	0.287846	0.296705	0.288001	0.268573	0.247436	0.199254	0.159776	0.112372			220.886	0.287846	0.288001	0.247436	0.159776
0.215881	4.52057e-06	5.23987e-06	5.32227e-06	5.05676e-06	4.61121e-06	4.14734e-06	3.1311e-06	2.30103e-06	1.31226e-06		215.881	0.23023	0.266864	0.27106	0.257538	0.234846	0.211222	0.159465	0.11719	0.0668325			215.881	0.266864	0.257538	0.211222	0.11719
0.210907	4.20563e-06	4.82483e-06	4.79126e-06	4.46777e-06	3.93677e-06	3.40576e-06	2.3468e-06	1.47095e-06	4.54712e-07		210.907	0.21419	0.245726	0.244016	0.227541	0.200497	0.173454	0.119521	0.0749145	0.0231582			210.907	0.245726	0.227541	0.173454	0.0749145
0.205902	3.9032e-06	4.37317e-06	4.26636e-06	3.84827e-06	3.26843e-06	2.66419e-06	1.57776e-06	6.34766e-07	-4.61121e-07		205.902	0.198788	0.222723	0.217283	0.19599	0.16646	0.135686	0.0803544	0.0323283	-0.0234846			205.902	0.222723	0.19599	0.135686	0.0323283
0.200897	3.57025e-06	3.93677e-06	3.74451e-06	3.25012e-06	2.6123e-06	1.93787e-06	8.02612e-07	-2.15149e-07	-1.28235e-06		200.897	0.181831	0.200497	0.190706	0.165527	0.133043	0.0986945	0.0408766	-0.0109574	-0.0653093			200.897	0.200497	0.165527	0.0986945	-0.0109574
0.195892	3.25378e-06	3.48206e-06	3.19824e-06	2.65503e-06	1.95007e-06	1.22681e-06	1.83105e-09	-1.00891e-06	-2.08862e-06		195.892	0.165713	0.177339	0.162885	0.135219	0.0993162	0.0624806	9.32546e-05	-0.0513833	-0.106372			195.892	0.177339	0.135219	0.0624806	-0.0513833
0.190918	2.92603e-06	3.05176e-06	2.70081e-06	2.06299e-06	1.31836e-06	4.93469e-07	-7.26929e-07	-1.75659e-06	-2.85645e-06		190.918	0.149021	0.155424	0.137551	0.105067	0.0671433	0.0251321	-0.0370221	-0.0894623	-0.145477			190.918	0.155424	0.105067	0.0251321	-0.0894623
0.185913	2.59155e-06	2.60925e-06	2.20642e-06	1.48621e-06	6.62842e-07	-1.83411e-07	-1.39496e-06	-2.45361e-06	-3.57361e-06		185.913	0.131986	0.132888	0.112372	0.0756917	0.0337582	-0.009341	-0.0710445	-0.124961	-0.182002			185.913	0.132888	0.0756917	-0.009341	-0.124961
0.180908	2.26471e-06	2.13135e-06	1.65863e-06	9.00574e-07	8.42285e-08	-7.81555e-07	-1.9989e-06	-3.10272e-06	-4.23614e-06		180.908	0.11534	0.108548	0.0844731	0.0458657	0.00428971	-0.0398042	-0.101803	-0.15802	-0.215745			180.908	0.108548	0.0458657	-0.0398042	-0.15802
0.175934	1.9455e-06	1.72607e-06	1.19812e-06	3.85437e-07	-4.56543e-07	-1.3385e-06	-2.565e-06	-3.70178e-06	-4.83398e-06		175.934	0.0990831	0.087908	0.0610196	0.0196301	-0.0232515	-0.0681691	-0.130634	-0.18853	-0.246192			175.934	0.087908	0.0196301	-0.0681691	-0.18853
0.170959	1.64307e-06	1.34247e-06	7.65686e-07	-8.42285e-08	-9.31091e-07	-1.84662e-06	-3.10089e-06	-4.22333e-06	-5.39246e-06		170.959	0.0836805	0.0683712	0.038996	-0.00428971	-0.04742	-0.0940473	-0.157927	-0.215092	-0.274635			170.959	0.0683712	-0.00428971	-0.0940473	-0.215092
0.165924	1.35284e-06	9.87244e-07	3.68652e-07	-4.96216e-07	-1.37665e-06	-2.30774e-06	-3.56659e-06	-4.6936e-06	-5.84106e-06		165.924	0.0688996	0.0502798	0.0187753	-0.025272	-0.0701119	-0.117532	-0.181644	-0.239043	-0.297482			165.924	0.0502798	-0.025272	-0.117532	-0.239043
0.16095	1.08246e-06	6.52466e-07	1.83105e-08	-8.72192e-07	-1.76636e-06	-2.70416e-06	-3.9502e-06	-5.09949e-06	-6.2439e-06		160.95	0.055129	0.0332297	0.000932546	-0.0444203	-0.0899596	-0.137722	-0.201181	-0.259714	-0.317998			160.95	0.0332297	-0.0444203	-0.137722	-0.259714
0.155945	8.33435e-07	3.69263e-07	-3.19214e-07	-1.21124e-06	-2.08771e-06	-3.02918e-06	-4.28284e-06	-5.43823e-06	-6.58569e-06		155.945	0.0424464	0.0188064	-0.0162574	-0.061688	-0.106326	-0.154274	-0.218123	-0.276966	-0.335406			155.945	0.0188064	-0.061688	-0.154274	-0.276966
0.15094	6.073e-07	1.02234e-07	-5.85327e-07	-1.48529e-06	-2.36664e-06	-3.31238e-06	-4.56299e-06	-5.71594e-06	-6.8512e-06		150.94	0.0309295	0.00520672	-0.0298104	-0.0756451	-0.120532	-0.168698	-0.232391	-0.29111	-0.348928			150.94	0.00520672	-0.0756451	-0.168698	-0.29111
0.145966	4.10767e-07	-1.19934e-07	-8.17871e-07	-1.71692e-06	-2.60895e-06	-3.55194e-06	-4.80042e-06	-5.93262e-06	-7.08313e-06		145.966	0.0209201	-0.00610818	-0.0416537	-0.0874418	-0.132872	-0.180898	-0.244483	-0.302145	-0.36074			145.966	-0.00610818	-0.0874418	-0.180898	-0.302145
0.140961	2.35596e-07	-3.08533e-07	-9.88464e-07	-1.93176e-06	-2.80365e-06	-3.7616e-06	-4.98352e-06	-6.12183e-06	-7.26318e-06		140.961	0.0119988	-0.0157134	-0.050342	-0.0983837	-0.142788	-0.191576	-0.253808	-0.311781	-0.36991			140.961	-0.0157134	-0.0983837	-0.191576	-0.311781
0.135956	9.0332e-08	-4.65088e-07	-1.17554e-06	-2.0816e-06	-2.96509e-06	-3.88641e-06	-5.13306e-06	-6.25305e-06	-7.39136e-06		135.956	0.00460056	-0.0236867	-0.0598695	-0.106015	-0.15101	-0.197933	-0.261424	-0.318465	-0.376438			135.956	-0.0236867	-0.106015	-0.197933	-0.318465
0.130981	-2.53296e-08	-5.94788e-07	-1.28326e-06	-2.20245e-06	-3.07098e-06	-4.02557e-06	-5.25818e-06	-6.37817e-06	-7.48901e-06		130.981	-0.00129002	-0.0302922	-0.0653559	-0.11217	-0.156404	-0.20502	-0.267796	-0.324837	-0.381411			130.981	-0.0302922	-0.11217	-0.20502	-0.324837
0.125977	-1.28784e-07	-6.96106e-07	-1.39801e-06	-2.3172e-06	-3.18115e-06	-4.10034e-06	-5.33752e-06	-6.4331e-06	-7.5592e-06		125.977	-0.00655891	-0.0354523	-0.0711999	-0.118014	-0.162014	-0.208828	-0.271837	-0.327635	-0.384986			125.977	-0.0354523	-0.118014	-0.208828	-0.327635
0.120972	-2.02637e-07	-7.81555e-07	-1.46576e-06	-2.36938e-06	-3.24432e-06	-4.15863e-06	-5.36804e-06	-6.48499e-06	-7.59277e-06		120.972	-0.0103202	-0.0398042	-0.0746503	-0.120672	-0.165232	-0.211797	-0.273391	-0.330277	-0.386696			120.972	-0.0398042	-0.120672	-0.211797	-0.330277
0.115997	-2.63977e-07	-8.40454e-07	-1.52313e-06	-2.42371e-06	-3.28552e-06	-4.20471e-06	-5.39551e-06	-6.5155e-06	-7.61108e-06		115.997	-0.0134442	-0.0428039	-0.0775723	-0.123438	-0.16733	-0.214144	-0.27479	-0.331831	-0.387628			115.997	-0.0428039	-0.123438	-0.214144	-0.331831
0.110992	-3.09448e-07	-8.78601e-07	-1.5802e-06	-2.4704e-06	-3.31085e-06	-4.21661e-06	-5.42297e-06	-6.52771e-06	-7.62329e-06		110.992	-0.01576	-0.0447467	-0.0804787	-0.125816	-0.16862	-0.21475	-0.276189	-0.332453	-0.38825			110.992	-0.0447467	-0.125816	-0.21475	-0.332453
0.105988	-3.43933e-07	-9.06982e-07	-1.63086e-06	-2.4942e-06	-3.33344e-06	-4.22455e-06	-5.42908e-06	-6.51855e-06	-7.60193e-06		105.988	-0.0175163	-0.0461921	-0.0830588	-0.127028	-0.16977	-0.215154	-0.2765	-0.331987	-0.387162			105.988	-0.0461921	-0.127028	-0.215154	-0.331987
0.101013	-3.79944e-07	-9.41773e-07	-1.61255e-06	-2.50824e-06	-3.34076e-06	-4.25049e-06	-5.41382e-06	-6.5033e-06	-7.58667e-06		101.013	-0.0193503	-0.047964	-0.0821263	-0.127743	-0.170143	-0.216475	-0.275723	-0.331209	-0.386385			101.013	-0.047964	-0.127743	-0.216475	-0.331209
0.096008	-3.92456e-07	-9.56726e-07	-1.62567e-06	-2.51495e-06	-3.33404e-06	-4.22333e-06	-5.40161e-06	-6.48499e-06	-7.5592e-06		96.008	-0.0199876	-0.0487255	-0.0827946	-0.128085	-0.169801	-0.215092	-0.275101	-0.330277	-0.384986			96.008	-0.0487255	-0.128085	-0.215092	-0.330277
0.091003	-3.98865e-07	-9.63745e-07	-1.64246e-06	-2.51007e-06	-3.34106e-06	-4.21753e-06	-5.37415e-06	-6.47278e-06	-7.53174e-06		91.003	-0.020314	-0.049083	-0.0836494	-0.127837	-0.170159	-0.214796	-0.273702	-0.329655	-0.383587			91.003	-0.049083	-0.127837	-0.214796	-0.329655
0.085999	-4.20837e-07	-9.71374e-07	-1.63727e-06	-2.51831e-06	-3.32947e-06	-4.21326e-06	-5.35278e-06	-6.46057e-06	-7.51038e-06		85.999	-0.021433	-0.0494716	-0.0833852	-0.128256	-0.169568	-0.214579	-0.272614	-0.329033	-0.382499			85.999	-0.0494716	-0.128256	-0.214579	-0.329033
0.081024	-4.19312e-07	-9.79004e-07	-1.64123e-06	-2.50336e-06	-3.32123e-06	-4.19586e-06	-5.36499e-06	-6.41479e-06	-7.47375e-06		81.024	-0.0213553	-0.0498601	-0.0835872	-0.127495	-0.169148	-0.213693	-0.273236	-0.326702	-0.380634			81.024	-0.0498601	-0.127495	-0.213693	-0.326702
0.076019	-4.30908e-07	-9.79614e-07	-1.64917e-06	-2.49817e-06	-3.31116e-06	-4.17694e-06	-5.33752e-06	-6.40564e-06	-7.44019e-06		76.019	-0.0219459	-0.0498912	-0.0839913	-0.12723	-0.168635	-0.212729	-0.271837	-0.326236	-0.378925			76.019	-0.0498912	-0.12723	-0.212729	-0.326236
0.071014	-4.29688e-07	-9.83887e-07	-1.64764e-06	-2.49634e-06	-3.30841e-06	-4.16077e-06	-5.31006e-06	-6.37817e-06	-7.43103e-06		71.014	-0.0218838	-0.0501088	-0.0839136	-0.127137	-0.168496	-0.211906	-0.270438	-0.324837	-0.378458			71.014	-0.0501088	-0.127137	-0.211906	-0.324837
0.06604	-4.2572e-07	-9.76257e-07	-1.64551e-06	-2.48444e-06	-3.28827e-06	-4.14703e-06	-5.2948e-06	-6.3446e-06	-7.41272e-06		66.04	-0.0216817	-0.0497203	-0.0838048	-0.126531	-0.16747	-0.211206	-0.269661	-0.323127	-0.377526			66.04	-0.0497203	-0.126531	-0.211206	-0.323127
0.061035	-4.26331e-07	-9.89685e-07	-1.64307e-06	-2.47681e-06	-3.28552e-06	-4.13818e-06	-5.27039e-06	-6.32324e-06	-7.36084e-06		61.035	-0.0217128	-0.0504041	-0.0836805	-0.126142	-0.16733	-0.210755	-0.268418	-0.322039	-0.374884			61.035	-0.0504041	-0.126142	-0.210755	-0.322039
0.05603	-4.31213e-07	-9.61304e-07	-1.62415e-06	-2.47376e-06	-3.26386e-06	-4.11499e-06	-5.26123e-06	-6.30188e-06	-7.33337e-06		56.03	-0.0219615	-0.0489587	-0.0827169	-0.125987	-0.166226	-0.209574	-0.267952	-0.320951	-0.373485			56.03	-0.0489587	-0.125987	-0.209574	-0.320951
0.051056	-4.31213e-07	-9.5459e-07	-1.61346e-06	-2.47009e-06	-3.26172e-06	-4.10614e-06	-5.24292e-06	-6.28357e-06	-7.31506e-06		51.056	-0.0219615	-0.0486167	-0.0821729	-0.125801	-0.166118	-0.209124	-0.267019	-0.320019	-0.372552			51.056	-0.0486167	-0.125801	-0.209124	-0.320019
0.046051	-4.23889e-07	-9.60693e-07	-1.60919e-06	-2.46185e-06	-3.23975e-06	-4.08875e-06	-5.22156e-06	-6.25305e-06	-7.29065e-06		46.051	-0.0215884	-0.0489276	-0.0819553	-0.125381	-0.164999	-0.208238	-0.265931	-0.318465	-0.371309			46.051	-0.0489276	-0.125381	-0.208238	-0.318465
0.041046	-4.34876e-07	-9.60388e-07	-1.60553e-06	-2.44812e-06	-3.2373e-06	-4.08569e-06	-5.2063e-06	-6.23474e-06	-7.26623e-06		41.046	-0.022148	-0.0489121	-0.0817688	-0.124681	-0.164874	-0.208082	-0.265154	-0.317532	-0.370065			41.046	-0.0489121	-0.124681	-0.208082	-0.317532
0.036041	-4.31213e-07	-9.56116e-07	-1.60889e-06	-2.43744e-06	-3.23456e-06	-4.06891e-06	-5.18494e-06	-6.20727e-06	-7.24182e-06		36.041	-0.0219615	-0.0486945	-0.0819398	-0.124137	-0.164734	-0.207227	-0.264066	-0.316133	-0.368822			36.041	-0.0486945	-0.124137	-0.207227	-0.316133
0.031067	-4.25415e-07	-9.47571e-07	-1.59638e-06	-2.43408e-06	-3.22754e-06	-4.06616e-06	-5.16968e-06	-6.19507e-06	-7.2113e-06		31.067	-0.0216662	-0.0482593	-0.0813025	-0.123966	-0.164377	-0.207087	-0.263289	-0.315511	-0.367268			31.067	-0.0482593	-0.123966	-0.207087	-0.315511
0.026062	-4.29993e-07	-9.57947e-07	-1.59454e-06	-2.42615e-06	-3.21259e-06	-4.04053e-06	-5.14831e-06	-6.17065e-06	-7.19604e-06		26.062	-0.0218993	-0.0487877	-0.0812092	-0.123562	-0.163615	-0.205782	-0.262201	-0.314268	-0.366491			26.062	-0.0487877	-0.123562	-0.205782	-0.314268
0.021057	-4.22058e-07	-9.40857e-07	-1.58691e-06	-2.41363e-06	-3.20923e-06	-4.03168e-06	-5.14831e-06	-6.17065e-06	-7.18689e-06		21.057	-0.0214952	-0.0479173	-0.0808207	-0.122925	-0.163444	-0.205331	-0.262201	-0.314268	-0.366024			21.057	-0.0479173	-0.122925	-0.205331	-0.314268
0.016083	-4.21448e-07	-9.42993e-07	-1.57379e-06	-2.40814e-06	-3.18787e-06	-4.01886e-06	-5.1239e-06	-6.14929e-06	-7.14111e-06		16.083	-0.0214641	-0.0480261	-0.0801524	-0.122645	-0.162356	-0.204678	-0.260958	-0.31318	-0.363693			16.083	-0.0480261	-0.122645	-0.204678	-0.31318
0.011078	-4.15344e-07	-9.40857e-07	-1.58051e-06	-2.39685e-06	-3.17261e-06	-4.00757e-06	-5.11169e-06	-6.11877e-06	-7.12891e-06		11.078	-0.0211533	-0.0479173	-0.0804943	-0.12207	-0.161579	-0.204103	-0.260336	-0.311626	-0.363071			11.078	-0.0479173	-0.12207	-0.204103	-0.311626
0.006104	-4.17786e-07	-9.45435e-07	-1.57562e-06	-2.39502e-06	-3.17719e-06	-3.99414e-06	-5.08728e-06	-6.10962e-06	-7.1228e-06		6.104	-0.0212776	-0.0481505	-0.0802456	-0.121977	-0.161812	-0.203419	-0.259092	-0.31116	-0.362761			6.104	-0.0481505	-0.121977	-0.203419	-0.31116
0.001099	-4.1626e-07	-9.40247e-07	-1.57043e-06	-1.17584e-06	-2.89917e-08	1.47644e-06	2.42157e-06	3.0307e-06	2.9126e-06		1.099	-0.0211999	-0.0478863	-0.0799814	-0.059885	-0.00147653	0.0751943	0.123329	0.154352	0.148337			1.099	-0.0478863	-0.059885	0.0751943	0.154352
0.004669	1.98059e-07	5.63049e-07	1.04462e-06	1.71661e-06	2.3465e-06	3.04962e-06	3.98468e-06	4.84314e-06	5.67627e-06		4.669	0.010087	0.0286758	0.0532018	0.0874262	0.119506	0.155316	0.202938	0.246659	0.289089			4.669	0.0286758	0.0874262	0.155316	0.246659
0.009644	2.13287e-07	6.09741e-07	1.11511e-06	1.79504e-06	2.45392e-06	3.18085e-06	4.12933e-06	5.01099e-06	5.88989e-06		9.644	0.0108626	0.0310538	0.0567921	0.0914206	0.124977	0.161999	0.210305	0.255207	0.299969			9.644	0.0310538	0.0914206	0.161999	0.255207
0.014648	2.23023e-07	6.32629e-07	1.16058e-06	1.83624e-06	2.51984e-06	3.25287e-06	4.21448e-06	5.12695e-06	6.01502e-06		14.648	0.0113584	0.0322195	0.0591079	0.0935189	0.128334	0.165667	0.214641	0.261113	0.306341			14.648	0.0322195	0.0935189	0.165667	0.261113
0.019653	2.29492e-07	6.48498e-07	1.17004e-06	1.88477e-06	2.57202e-06	3.29834e-06	4.29321e-06	5.2002e-06	6.08521e-06		19.653	0.0116879	0.0330277	0.0595897	0.0959901	0.130992	0.167983	0.218651	0.264843	0.309916			19.653	0.0330277	0.0959901	0.167983	0.264843
0.024658	2.36511e-07	6.5979e-07	1.19721e-06	1.91315e-06	2.6004e-06	3.35663e-06	4.34326e-06	5.27344e-06	6.18591e-06		24.658	0.0120454	0.0336028	0.060973	0.0974355	0.132437	0.170951	0.2212	0.268573	0.315045			24.658	0.0336028	0.0974355	0.170951	0.268573
0.029633	2.41089e-07	6.77795e-07	1.22528e-06	1.94397e-06	2.64923e-06	3.39661e-06	4.40369e-06	5.34363e-06	6.25e-06		29.633	0.0122785	0.0345198	0.0624029	0.0990053	0.134924	0.172987	0.224277	0.272148	0.318309			29.633	0.0345198	0.0990053	0.172987	0.272148
0.034637	2.49939e-07	6.8573e-07	1.24237e-06	1.9754e-06	2.65778e-06	3.44482e-06	4.44397e-06	5.38025e-06	6.30493e-06		34.637	0.0127293	0.0349239	0.0632733	0.100606	0.135359	0.175443	0.226329	0.274013	0.321107			34.637	0.0349239	0.100606	0.175443	0.274013
0.039642	2.49023e-07	6.91833e-07	1.24176e-06	1.98212e-06	2.6944e-06	3.46527e-06	4.487e-06	5.41992e-06	6.35681e-06		39.642	0.0126826	0.0352347	0.0632422	0.100948	0.137224	0.176484	0.22852	0.276034	0.323749			39.642	0.0352347	0.100948	0.176484	0.276034
0.044647	2.54822e-07	7.04041e-07	1.2674e-06	2.00897e-06	2.7124e-06	3.48114e-06	4.51843e-06	5.46875e-06	6.41479e-06		44.647	0.0129779	0.0358564	0.0645477	0.102316	0.138141	0.177293	0.230121	0.27852	0.326702			44.647	0.0358564	0.102316	0.177293	0.27852
0.049622	2.62756e-07	7.05566e-07	1.26099e-06	2.02148e-06	2.74048e-06	3.52875e-06	4.53369e-06	5.51758e-06	6.43616e-06		49.622	0.013382	0.0359341	0.0642213	0.102953	0.139571	0.179717	0.230898	0.281007	0.32779			49.622	0.0359341	0.102953	0.179717	0.281007
0.054626	2.62756e-07	7.14417e-07	1.29242e-06	2.04071e-06	2.76154e-06	3.54523e-06	4.58221e-06	5.5542e-06	6.49109e-06		54.626	0.013382	0.0363848	0.0658222	0.103932	0.140644	0.180557	0.23337	0.282872	0.330588			54.626	0.0363848	0.103932	0.180557	0.282872
0.059631	2.73743e-07	7.2937e-07	1.29883e-06	2.05536e-06	2.79266e-06	3.57483e-06	4.61487e-06	5.58472e-06	6.53076e-06		59.631	0.0139416	0.0371464	0.0661486	0.104678	0.142229	0.182064	0.235033	0.284427	0.332608			59.631	0.0371464	0.104678	0.182064	0.284427
0.064606	2.77405e-07	7.48596e-07	1.32019e-06	2.07672e-06	2.80945e-06	3.59528e-06	4.64783e-06	5.63049e-06	6.57349e-06		64.606	0.0141281	0.0381256	0.0672366	0.105766	0.143084	0.183105	0.236711	0.286758	0.334784			64.606	0.0381256	0.105766	0.183105	0.286758
0.069611	2.85339e-07	7.54089e-07	1.33636e-06	2.0993e-06	2.83112e-06	3.63953e-06	4.68628e-06	5.67322e-06	6.62231e-06		69.611	0.0145322	0.0384054	0.0680604	0.106916	0.144187	0.185359	0.23867	0.288934	0.337271			69.611	0.0384054	0.106916	0.185359	0.288934
0.074615	3.03955e-07	7.7179e-07	1.34552e-06	2.13013e-06	2.86529e-06	3.67706e-06	4.72107e-06	5.71899e-06	6.67419e-06		74.615	0.0154803	0.0393068	0.0685266	0.108486	0.145928	0.187271	0.240442	0.291265	0.339913			74.615	0.0393068	0.108486	0.187271	0.291265
0.07959	3.14331e-07	7.79114e-07	1.37054e-06	2.14569e-06	2.90222e-06	3.71307e-06	4.75769e-06	5.74951e-06	6.71692e-06		79.59	0.0160087	0.0396798	0.0698011	0.109279	0.147809	0.189105	0.242307	0.29282	0.342089			79.59	0.0396798	0.109279	0.189105	0.29282
0.084595	3.33252e-07	8.11462e-07	1.40259e-06	2.18109e-06	2.93213e-06	3.75641e-06	4.80957e-06	5.8075e-06	6.77795e-06		84.595	0.0169723	0.0413273	0.0714331	0.111082	0.149332	0.191312	0.244949	0.295773	0.345198			84.595	0.0413273	0.111082	0.191312	0.295773
0.0896	3.67737e-07	8.4137e-07	1.45843e-06	2.23785e-06	2.98614e-06	3.81165e-06	4.87976e-06	5.89294e-06	6.85425e-06		89.6	0.0187286	0.0428505	0.0742773	0.113973	0.152083	0.194125	0.248524	0.300124	0.349083			89.6	0.0428505	0.113973	0.194125	0.300124
0.094574	4.12598e-07	8.7677e-07	1.50024e-06	2.27936e-06	3.04077e-06	3.87299e-06	4.94385e-06	5.95093e-06	6.92444e-06		94.574	0.0210134	0.0446534	0.0764066	0.116086	0.154865	0.197249	0.251788	0.303078	0.352658			94.574	0.0446534	0.116086	0.197249	0.303078
0.099579	4.73633e-07	9.48181e-07	1.55029e-06	2.35596e-06	3.11157e-06	3.94714e-06	5.02319e-06	6.02722e-06	7.01599e-06		99.579	0.0241219	0.0482904	0.0789556	0.119988	0.158471	0.201026	0.255829	0.306963	0.357321			99.579	0.0482904	0.119988	0.201026	0.306963
0.104584	5.45044e-07	1.01776e-06	1.64123e-06	2.46033e-06	3.21564e-06	4.04663e-06	5.13001e-06	6.14624e-06	7.13196e-06		104.584	0.0277588	0.051834	0.0835872	0.125303	0.163771	0.206093	0.261268	0.313025	0.363227			104.584	0.051834	0.125303	0.206093	0.313025
0.109589	6.49109e-07	1.12305e-06	1.75751e-06	2.56805e-06	3.3374e-06	4.1803e-06	5.26428e-06	6.28967e-06	7.27234e-06		109.589	0.0330588	0.0571962	0.0895089	0.13079	0.169972	0.2129	0.268107	0.32033	0.370376			109.589	0.0571962	0.13079	0.2129	0.32033
0.114594	7.89185e-07	1.27502e-06	1.91742e-06	2.73132e-06	3.50403e-06	4.3515e-06	5.43213e-06	6.45142e-06	7.43408e-06		114.594	0.0401927	0.0649363	0.0976531	0.139105	0.178458	0.22162	0.276655	0.328567	0.378614			114.594	0.0649363	0.139105	0.22162	0.328567
0.119568	9.85718e-07	1.4679e-06	2.11182e-06	2.95441e-06	3.71582e-06	4.56146e-06	5.66711e-06	6.6864e-06	7.66296e-06		119.568	0.0502021	0.0747592	0.107554	0.150466	0.189245	0.232313	0.288623	0.340535	0.390271			119.568	0.0747592	0.150466	0.232313	0.340535
0.124573	1.25458e-06	1.73767e-06	2.39624e-06	3.24737e-06	4.00818e-06	4.85229e-06	5.95703e-06	6.97021e-06	7.91931e-06		124.573	0.063895	0.0884987	0.122039	0.165387	0.204134	0.247125	0.303388	0.354989	0.403326			124.573	0.0884987	0.165387	0.247125	0.354989
0.129547	1.60126e-06	2.09625e-06	2.7945e-06	3.62885e-06	4.39331e-06	5.23987e-06	6.33545e-06	7.34863e-06	8.30689e-06		129.547	0.0815512	0.106761	0.142322	0.184815	0.223749	0.266864	0.322661	0.374262	0.423065			129.547	0.106761	0.184815	0.266864	0.374262
0.134552	2.05627e-06	2.55951e-06	3.30109e-06	4.15649e-06	4.91028e-06	5.74951e-06	6.82983e-06	7.85217e-06	8.79211e-06		134.552	0.104725	0.130354	0.168123	0.211688	0.250078	0.29282	0.34784	0.399907	0.447778			134.552	0.130354	0.211688	0.29282	0.399907
0.139557	2.63916e-06	3.17322e-06	3.94501e-06	4.83398e-06	5.58472e-06	6.4209e-06	7.51953e-06	8.51135e-06	9.42078e-06		139.557	0.134411	0.16161	0.200917	0.246192	0.284427	0.327013	0.382966	0.433479	0.479795			139.557	0.16161	0.246192	0.327013	0.433479
0.144531	3.3548e-06	3.94348e-06	4.79126e-06	5.7373e-06	6.46362e-06	7.31811e-06	8.39233e-06	9.39331e-06	1.02661e-05		144.531	0.170858	0.200839	0.244016	0.292198	0.329189	0.372708	0.427417	0.478396	0.522847			144.531	0.200839	0.292198	0.372708	0.478396
0.149536	4.22943e-06	4.91333e-06	5.86243e-06	6.8634e-06	7.59888e-06	8.46863e-06	9.52759e-06	1.05133e-05	1.1322e-05		149.536	0.215403	0.250233	0.29857	0.349549	0.387007	0.431303	0.485235	0.535437	0.576624			149.536	0.250233	0.349549	0.431303	0.535437
0.154541	5.24902e-06	6.10352e-06	7.2052e-06	8.28857e-06	9.03626e-06	9.92737e-06	1.09741e-05	1.19568e-05	1.27167e-05		154.541	0.26733	0.310849	0.366957	0.422133	0.460212	0.505596	0.558906	0.608953	0.647653			154.541	0.310849	0.422133	0.505596	0.608953
0.159515	6.41785e-06	7.52869e-06	8.82873e-06	1.00494e-05	1.07941e-05	1.17279e-05	1.27869e-05	1.37695e-05	1.44562e-05		159.515	0.326857	0.383432	0.449643	0.511813	0.549736	0.597296	0.651228	0.701275	0.736245			159.515	0.383432	0.511813	0.597296	0.701275
0.16452	7.69653e-06	9.16748e-06	1.07025e-05	1.21307e-05	1.29547e-05	1.39374e-05	1.50299e-05	1.60156e-05	1.6629e-05		164.52	0.39198	0.466895	0.545073	0.617812	0.659776	0.709823	0.765465	0.815667	0.846908			164.52	0.466895	0.617812	0.709823	0.815667
0.169525	9.03931e-06	1.09772e-05	1.28967e-05	1.45721e-05	1.54785e-05	1.65649e-05	1.77002e-05	1.87195e-05	1.92658e-05		169.525	0.460367	0.559061	0.656824	0.742151	0.788313	0.843643	0.901462	0.953373	0.981194			169.525	0.559061	0.742151	0.843643	0.953373
0.17453	1.03912e-05	1.29425e-05	1.52801e-05	1.73279e-05	1.83685e-05	1.95984e-05	2.08252e-05	2.18994e-05	2.24121e-05		174.53	0.52922	0.659155	0.77821	0.8825	0.935499	0.998135	1.06062	1.11533	1.14144			174.53	0.659155	0.8825	0.998135	1.11533
0.179504	1.16791e-05	1.49658e-05	1.78497e-05	2.03278e-05	2.16034e-05	2.30286e-05	2.43897e-05	2.55585e-05	2.60529e-05		179.504	0.594809	0.762201	0.909077	1.03528	1.10025	1.17283	1.24215	1.30168	1.32686			179.504	0.762201	1.03528	1.17283	1.30168
0.184509	1.28235e-05	1.69525e-05	2.04712e-05	2.34955e-05	2.50854e-05	2.67731e-05	2.83234e-05	2.96509e-05	3.01544e-05		184.509	0.653093	0.863382	1.04259	1.19661	1.27759	1.36354	1.44249	1.5101	1.53575			184.509	0.863382	1.19661	1.36354	1.5101
0.189484	1.37726e-05	1.87866e-05	2.3056e-05	2.67059e-05	2.86957e-05	3.07434e-05	3.25653e-05	3.4082e-05	3.46741e-05		189.484	0.70143	0.956792	1.17423	1.36012	1.46146	1.56575	1.65853	1.73578	1.76593			189.484	0.956792	1.36012	1.56575	1.73578
0.194489	1.44836e-05	2.03674e-05	2.54425e-05	2.98004e-05	3.22937e-05	3.48267e-05	3.69995e-05	3.87787e-05	3.95019e-05		194.489	0.737644	1.0373	1.29577	1.51772	1.6447	1.7737	1.88437	1.97498	2.01181			194.489	1.0373	1.51772	1.7737	1.97498
0.199493	1.492e-05	2.15942e-05	2.7478e-05	3.26172e-05	3.57727e-05	3.87634e-05	4.13635e-05	4.34967e-05	4.44397e-05		199.493	0.75987	1.09978	1.39944	1.66118	1.82188	1.9742	2.10662	2.21526	2.26329			199.493	1.09978	1.66118	1.9742	2.21526
0.204468	1.51337e-05	2.23907e-05	2.9068e-05	3.50372e-05	3.88397e-05	4.24347e-05	4.55566e-05	4.80774e-05	4.93469e-05		204.468	0.77075	1.14035	1.48042	1.78443	1.97809	2.16118	2.32018	2.44856	2.51321			204.468	1.14035	1.78443	2.16118	2.44856
0.209503	1.51611e-05	2.27508e-05	3.00842e-05	3.68042e-05	4.13696e-05	4.56268e-05	4.93378e-05	5.23377e-05	5.40466e-05		209.503	0.772148	1.15869	1.53217	1.87442	2.10693	2.32375	2.51275	2.66553	2.75257			209.503	1.15869	1.87442	2.32375	2.66553
0.214478	1.50665e-05	2.26776e-05	3.05481e-05	3.78448e-05	4.31793e-05	4.81567e-05	5.24902e-05	5.60608e-05	5.82886e-05		214.478	0.76733	1.15496	1.5558	1.92742	2.1991	2.4526	2.6733	2.85515	2.96861			214.478	1.15496	1.92742	2.4526	2.85515
0.219452	1.49261e-05	2.229e-05	3.03558e-05	3.81165e-05	4.41711e-05	4.98352e-05	5.48401e-05	5.9021e-05	6.18591e-05		219.452	0.760181	1.13522	1.54601	1.94125	2.24961	2.53808	2.79298	3.00591	3.15045			219.452	1.13522	1.94125	2.53808	3.00591
0.224457	1.47675e-05	2.1695e-05	2.96692e-05	3.76434e-05	4.42841e-05	5.05981e-05	5.62439e-05	6.10046e-05	6.45752e-05		224.457	0.752099	1.10491	1.51104	1.91716	2.25536	2.57694	2.86447	3.10693	3.28878			224.457	1.10491	1.91716	2.57694	3.10693
0.229462	1.46393e-05	2.10327e-05	2.86499e-05	3.65204e-05	4.357e-05	5.03845e-05	5.65491e-05	6.19202e-05	6.62231e-05		229.462	0.745571	1.07118	1.45912	1.85996	2.21899	2.56606	2.88001	3.15356	3.37271			229.462	1.07118	1.85996	2.56606	3.15356
0.234467	1.45447e-05	2.03949e-05	2.74536e-05	3.49823e-05	4.21631e-05	4.9292e-05	5.58777e-05	6.17065e-05	6.67419e-05		234.467	0.740753	1.0387	1.3982	1.78163	2.14734	2.51041	2.84582	3.14268	3.39913			234.467	1.0387	1.78163	2.51041	3.14268
0.239441	1.44897e-05	1.98914e-05	2.63153e-05	3.32703e-05	4.02893e-05	4.74762e-05	5.42297e-05	6.04248e-05	6.61011e-05		239.441	0.737955	1.01306	1.34022	1.69444	2.05191	2.41794	2.76189	3.0774	3.36649			239.441	1.01306	1.69444	2.41794	3.0774
0.244446	1.44501e-05	1.95068e-05	2.53021e-05	3.16559e-05	3.82568e-05	4.52332e-05	5.19409e-05	5.82581e-05	6.44226e-05		244.446	0.735934	0.993473	1.28862	1.61222	1.9484	2.3037	2.64532	2.96705	3.28101			244.446	0.993473	1.61222	2.3037	2.96705
0.249451	1.44501e-05	1.92474e-05	2.45605e-05	3.0249e-05	3.6322e-05	4.28863e-05	4.93011e-05	5.55725e-05	6.19202e-05		249.451	0.735934	0.980262	1.25086	1.54057	1.84986	2.18418	2.51088	2.83028	3.15356			249.451	0.980262	1.54057	2.18418	2.83028
0.254456	1.44684e-05	1.91193e-05	2.39929e-05	2.9187e-05	3.47015e-05	4.0744e-05	4.6698e-05	5.27039e-05	5.9021e-05		254.456	0.736867	0.973734	1.22195	1.48648	1.76733	2.07507	2.3783	2.68418	3.00591			254.456	0.973734	1.48648	2.07507	2.68418
0.25943	1.44897e-05	1.9046e-05	2.3642e-05	2.84454e-05	3.34656e-05	3.89679e-05	4.44305e-05	4.99878e-05	5.60303e-05		259.43	0.737955	0.970004	1.20407	1.44871	1.70438	1.98461	2.26282	2.54585	2.85359			259.43	0.970004	1.44871	1.98461	2.54585
0.264435	1.45325e-05	1.90399e-05	2.34406e-05	2.79785e-05	3.26111e-05	3.76434e-05	4.26392e-05	4.77661e-05	5.33447e-05		264.435	0.740131	0.969693	1.19381	1.42493	1.66086	1.91716	2.17159	2.4327	2.71682			264.435	0.969693	1.42493	1.91716	2.4327
0.26944	1.45813e-05	1.90613e-05	2.33154e-05	2.77039e-05	3.20709e-05	3.6731e-05	4.13727e-05	4.60876e-05	5.1178e-05		269.44	0.742618	0.970781	1.18744	1.41094	1.63335	1.87069	2.10709	2.34722	2.60647			269.44	0.970781	1.41094	1.87069	2.34722
0.274414	1.46271e-05	1.90887e-05	2.32696e-05	2.75635e-05	3.17596e-05	3.61755e-05	4.05334e-05	4.49249e-05	4.95911e-05		274.414	0.744949	0.97218	1.18511	1.40379	1.6175	1.8424	2.06435	2.288	2.52565			274.414	0.97218	1.40379	1.8424	2.288
0.279419	1.46851e-05	1.91528e-05	2.32971e-05	2.75146e-05	3.15949e-05	3.58459e-05	4.0033e-05	4.42078e-05	4.85016e-05		279.419	0.747902	0.975443	1.18651	1.40131	1.60911	1.82561	2.03886	2.25148	2.47016			279.419	0.975443	1.40131	1.82561	2.25148
0.284424	1.47247e-05	1.92413e-05	2.33063e-05	2.75024e-05	3.15308e-05	3.56842e-05	3.97522e-05	4.37775e-05	4.78455e-05		284.424	0.749923	0.979951	1.18698	1.40068	1.60584	1.81738	2.02456	2.22956	2.43674			284.424	0.979951	1.40068	1.81738	2.22956
0.289398	1.47705e-05	1.93115e-05	2.33429e-05	2.75238e-05	3.15216e-05	3.56171e-05	3.96057e-05	4.35394e-05	4.7467e-05		289.398	0.752254	0.983525	1.18884	1.40177	1.60538	1.81396	2.0171	2.21744	2.41747			289.398	0.983525	1.40177	1.81396	2.21744
0.294403	1.48132e-05	1.93848e-05	2.33917e-05	2.75543e-05	3.1546e-05	3.56018e-05	3.95447e-05	4.34296e-05	4.72595e-05		294.403	0.75443	0.987256	1.19133	1.40333	1.60662	1.81318	2.01399	2.21184	2.4069			294.403	0.987256	1.40333	1.81318	2.21184
0.299408	1.48377e-05	1.94733e-05	2.34314e-05	2.76001e-05	3.15735e-05	3.5611e-05	3.95142e-05	4.33624e-05	4.71374e-05		299.408	0.755674	0.991763	1.19335	1.40566	1.60802	1.81365	2.01243	2.20843	2.40069			299.408	0.991763	1.40566	1.81365	2.20843
0.304413	1.48682e-05	1.95343e-05	2.34772e-05	2.76245e-05	3.16101e-05	3.56323e-05	3.95111e-05	4.3335e-05	4.70764e-05		304.413	0.757227	0.994871	1.19568	1.4069	1.60989	1.81473	2.01228	2.20703	2.39758			304.413	0.994871	1.4069	1.81473	2.20703
0.309387	1.48743e-05	1.95923e-05	2.35382e-05	2.76764e-05	3.16559e-05	3.56506e-05	3.95172e-05	4.33258e-05	4.70428e-05		309.387	0.757539	0.997825	1.19879	1.40954	1.61222	1.81567	2.01259	2.20656	2.39587			309.387	0.997825	1.40954	1.81567	2.20656
0.314392	1.48804e-05	1.96472e-05	2.35535e-05	2.77008e-05	3.16864e-05	3.56781e-05	3.95172e-05	4.33197e-05	4.70215e-05		314.392	0.757849	1.00062	1.19957	1.41079	1.61377	1.81707	2.01259	2.20625	2.39478			314.392	1.00062	1.41079	1.81707	2.20625
0.319397	1.4856e-05	1.96899e-05	2.35809e-05	2.77222e-05	3.17078e-05	3.57056e-05	3.95019e-05	4.33044e-05	4.70154e-05		319.397	0.756606	1.0028	1.20096	1.41188	1.61486	1.81847	2.01181	2.20547	2.39447			319.397	1.0028	1.41188	1.81847	2.20547
0.324371	1.4856e-05	1.97144e-05	2.3584e-05	2.77283e-05	3.17108e-05	3.57178e-05	3.94897e-05	4.32739e-05	4.69574e-05		324.371	0.756606	1.00404	1.20112	1.41219	1.61502	1.81909	2.01119	2.20392	2.39152			324.371	1.00404	1.41219	1.81909	2.20392
0.329376	1.48132e-05	1.97174e-05	2.35931e-05	2.77161e-05	3.17078e-05	3.57636e-05	3.94562e-05	4.32434e-05	4.69177e-05		329.376	0.75443	1.0042	1.20159	1.41156	1.61486	1.82142	2.00948	2.20236	2.38949			329.376	1.0042	1.41156	1.82142	2.20236
0.334381	1.47736e-05	1.97266e-05	2.35779e-05	2.77008e-05	3.16833e-05	3.56598e-05	3.94226e-05	4.32037e-05	4.68903e-05		334.381	0.752409	1.00466	1.20081	1.41079	1.61362	1.81613	2.00777	2.20034	2.3881			334.381	1.00466	1.41079	1.81613	2.20034
0.339355	1.47186e-05	1.97144e-05	2.35443e-05	2.76642e-05	3.16498e-05	3.56506e-05	3.93585e-05	4.31244e-05	4.6817e-05		339.355	0.749612	1.00404	1.1991	1.40892	1.61191	1.81567	2.00451	2.1963	2.38437			339.355	1.00404	1.40892	1.81567	2.1963
0.34433	1.46576e-05	1.9693e-05	2.35077e-05	2.76001e-05	3.16162e-05	3.55682e-05	3.92914e-05	4.3045e-05	4.67316e-05		344.33	0.746503	1.00295	1.19723	1.40566	1.6102	1.81147	2.00109	2.19226	2.38001			344.33	1.00295	1.40566	1.81147	2.19226
0.349365	1.45874e-05	1.96655e-05	2.34772e-05	2.75421e-05	3.1546e-05	3.55042e-05	3.91937e-05	4.29504e-05	4.66553e-05		349.365	0.742928	1.00155	1.19568	1.4027	1.60662	1.80821	1.99612	2.18744	2.37613			349.365	1.00155	1.4027	1.80821	2.18744
0.35434	1.45019e-05	1.96167e-05	2.341e-05	2.74933e-05	3.14728e-05	3.54217e-05	3.90961e-05	4.28436e-05	4.65424e-05		354.34	0.738577	0.999068	1.19226	1.40022	1.60289	1.80401	1.99114	2.182	2.37038			354.34	0.999068	1.40022	1.80401	2.182
0.359344	1.44196e-05	1.95618e-05	2.33337e-05	2.73956e-05	3.13965e-05	3.53394e-05	3.90076e-05	4.26971e-05	4.6405e-05		359.344	0.73438	0.99627	1.18837	1.39524	1.59901	1.79981	1.98663	2.17454	2.36338			359.344	0.99627	1.39524	1.79981	2.17454
0.364349	1.43372e-05	1.94885e-05	2.323e-05	2.72949e-05	3.12988e-05	3.52173e-05	3.88641e-05	4.2572e-05	4.62585e-05		364.349	0.730184	0.99254	1.18309	1.39012	1.59403	1.7936	1.97933	2.16817	2.35592			364.349	0.99254	1.39012	1.7936	2.16817
0.369324	1.42425e-05	1.94092e-05	2.31506e-05	2.72064e-05	3.11859e-05	3.50922e-05	3.87207e-05	4.24042e-05	4.60754e-05		369.324	0.725365	0.988499	1.17905	1.38561	1.58828	1.78722	1.97202	2.15962	2.3466			369.324	0.988499	1.38561	1.78722	2.15962
0.374329	1.41449e-05	1.93268e-05	2.30469e-05	2.70813e-05	3.10455e-05	3.49731e-05	3.85712e-05	4.22546e-05	4.58893e-05		374.329	0.720392	0.984303	1.17377	1.37924	1.58113	1.78116	1.96441	2.15201	2.33712			374.329	0.984303	1.37924	1.78116	2.15201
0.379303	1.40564e-05	1.92261e-05	2.29492e-05	2.69409e-05	3.09174e-05	3.48267e-05	3.8385e-05	4.20563e-05	4.56696e-05		379.303	0.715885	0.979173	1.16879	1.37209	1.5746	1.7737	1.95493	2.1419	2.32593			379.303	0.979173	1.37209	1.7737	2.1419
0.384308	1.39435e-05	1.91101e-05	2.28058e-05	2.68097e-05	3.07648e-05	3.46497e-05	3.8205e-05	4.18518e-05	4.54468e-05		384.308	0.710134	0.973268	1.16149	1.3654	1.56683	1.76469	1.94576	2.13149	2.31458			384.308	0.973268	1.3654	1.76469	2.13149
0.389313	1.38458e-05	1.90064e-05	2.26685e-05	2.66296e-05	3.05847e-05	3.44696e-05	3.80035e-05	4.16321e-05	4.5221e-05		389.313	0.705161	0.967983	1.15449	1.35623	1.55766	1.75552	1.9355	2.1203	2.30308			389.313	0.967983	1.35623	1.75552	2.1203
0.394318	1.37421e-05	1.88782e-05	2.25281e-05	2.6474e-05	3.04138e-05	3.42712e-05	3.77777e-05	4.13849e-05	4.49768e-05		394.318	0.699876	0.961455	1.14734	1.34831	1.54896	1.74542	1.924	2.10771	2.29064			394.318	0.961455	1.34831	1.74542	2.10771
0.399292	1.36444e-05	1.87622e-05	2.23785e-05	2.63123e-05	3.02093e-05	3.2254e-05	3.28979e-05	3.41705e-05	3.7854e-05		399.292	0.694902	0.955549	1.13973	1.34007	1.53855	1.64268	1.67547	1.74029	1.92788			399.292	0.955549	1.34007	1.64268	1.74029
0.396912	1.22894e-05	1.59027e-05	1.78314e-05	1.95526e-05	2.1402e-05	2.30133e-05	2.37274e-05	2.47986e-05	2.60651e-05		396.912	0.625894	0.809916	0.908145	0.995804	1.08999	1.17206	1.20842	1.26298	1.32748			396.912	0.809916	0.995804	1.17206	1.26298
0.391907	1.18072e-05	1.51062e-05	1.68427e-05	1.83685e-05	1.99921e-05	2.14081e-05	2.19452e-05	2.27966e-05	2.37457e-05		391.907	0.601337	0.769351	0.857787	0.935499	1.01819	1.0903	1.11766	1.16102	1.20936			391.907	0.769351	0.935499	1.0903	1.16102
0.386902	1.14319e-05	1.44897e-05	1.60797e-05	1.74408e-05	1.89148e-05	2.01538e-05	2.05902e-05	2.13135e-05	2.20642e-05		386.902	0.58222	0.737955	0.818931	0.888251	0.96332	1.02642	1.04865	1.08548	1.12372			386.902	0.737955	0.888251	1.02642	1.08548
0.381927	1.11054e-05	1.39557e-05	1.54327e-05	1.66595e-05	1.7981e-05	1.91345e-05	1.94672e-05	2.00653e-05	2.07214e-05		381.927	0.56559	0.710756	0.785981	0.848462	0.915761	0.974511	0.991452	1.02192	1.05533			381.927	0.710756	0.848462	0.974511	1.02192
0.376892	1.08063e-05	1.34674e-05	1.48437e-05	1.59668e-05	1.71875e-05	1.82373e-05	1.84723e-05	1.89606e-05	1.95221e-05		376.892	0.550358	0.685888	0.755984	0.813181	0.87535	0.928816	0.940784	0.965652	0.99425			376.892	0.685888	0.813181	0.928816	0.965652
0.371918	1.05377e-05	1.30371e-05	1.4328e-05	1.53473e-05	1.6452e-05	1.73859e-05	1.7572e-05	1.79901e-05	1.84418e-05		371.918	0.53668	0.663973	0.729717	0.781629	0.837893	0.885453	0.894934	0.916227	0.939229			371.918	0.663973	0.781629	0.885453	0.916227
0.366913	1.02814e-05	1.26282e-05	1.38245e-05	1.47675e-05	1.57715e-05	1.66168e-05	1.67572e-05	1.7096e-05	1.74683e-05		366.913	0.523625	0.643146	0.704072	0.752099	0.803233	0.846286	0.853435	0.870688	0.889649			366.913	0.643146	0.752099	0.846286	0.870688
0.361908	1.00372e-05	1.22345e-05	1.33789e-05	1.4212e-05	1.5155e-05	1.5918e-05	1.59851e-05	1.62628e-05	1.65619e-05		361.908	0.511191	0.623097	0.681381	0.723812	0.771838	0.810694	0.814113	0.828257	0.843488			361.908	0.623097	0.723812	0.810694	0.828257
0.356934	9.8114e-06	1.18683e-05	1.29303e-05	1.37085e-05	1.45386e-05	1.52527e-05	1.52618e-05	1.54755e-05	1.56982e-05		356.934	0.499689	0.604446	0.658533	0.698167	0.740442	0.776811	0.777277	0.788157	0.799503			356.934	0.604446	0.698167	0.776811	0.788157
0.351929	9.58557e-06	1.15082e-05	1.25e-05	1.3205e-05	1.39832e-05	1.45935e-05	1.45752e-05	1.47247e-05	1.48865e-05		351.929	0.488188	0.586105	0.636618	0.672522	0.712154	0.74324	0.742307	0.749923	0.75816			351.929	0.586105	0.672522	0.74324	0.749923
0.346924	9.36585e-06	1.11511e-05	1.2088e-05	1.27258e-05	1.34338e-05	1.39954e-05	1.39008e-05	1.40015e-05	1.41357e-05		346.924	0.476997	0.567921	0.615636	0.64812	0.684178	0.712776	0.707958	0.713087	0.719926			346.924	0.567921	0.64812	0.712776	0.713087
0.341949	9.15527e-06	1.08246e-05	1.17065e-05	1.22589e-05	1.28967e-05	1.33881e-05	1.32751e-05	1.33118e-05	1.33637e-05		341.949	0.466273	0.55129	0.596208	0.62434	0.656824	0.681847	0.676096	0.677961	0.680604			341.949	0.55129	0.62434	0.681847	0.677961
0.336945	8.9386e-06	1.04919e-05	1.12976e-05	1.18164e-05	1.23779e-05	1.28052e-05	1.26373e-05	1.26129e-05	1.26251e-05		336.945	0.455238	0.534349	0.575381	0.601803	0.630401	0.652161	0.643612	0.642369	0.642991			336.945	0.534349	0.601803	0.652161	0.642369
0.33194	8.72498e-06	1.01685e-05	1.08948e-05	1.13678e-05	1.18652e-05	1.22223e-05	1.20178e-05	1.19446e-05	1.18988e-05		331.94	0.444358	0.517874	0.554865	0.578956	0.60429	0.622475	0.612061	0.608331	0.605999			331.94	0.517874	0.578956	0.622475	0.608331
0.326965	8.5144e-06	9.84192e-06	1.05316e-05	1.09131e-05	1.13556e-05	1.16638e-05	1.14044e-05	1.12763e-05	1.11786e-05		326.965	0.433634	0.501244	0.53637	0.555798	0.578334	0.594032	0.580821	0.574293	0.56932			326.965	0.501244	0.555798	0.594032	0.574293
0.32196	8.31909e-06	9.53979e-06	1.01685e-05	1.04981e-05	1.08643e-05	1.10901e-05	1.08093e-05	1.06232e-05	1.04431e-05		321.96	0.423687	0.485857	0.517874	0.53466	0.553311	0.564812	0.550513	0.541032	0.531862			321.96	0.485857	0.53466	0.564812	0.541032
0.316956	8.12073e-06	9.24988e-06	9.79614e-06	1.00617e-05	1.03699e-05	1.0553e-05	1.02051e-05	9.9823e-06	9.78394e-06		316.956	0.413584	0.471091	0.498912	0.512434	0.528132	0.537458	0.519739	0.508393	0.498291			316.956	0.471091	0.512434	0.537458	0.508393
0.311981	7.91931e-06	8.92334e-06	9.42688e-06	9.65576e-06	9.88159e-06	1.00098e-05	9.61609e-06	9.34753e-06	9.07593e-06		311.981	0.403326	0.454461	0.480106	0.491763	0.503264	0.509792	0.489742	0.476065	0.462232			311.981	0.454461	0.491763	0.509792	0.476065
0.306946	7.70264e-06	8.60291e-06	9.07288e-06	9.24988e-06	9.41467e-06	9.47571e-06	9.0332e-06	8.70972e-06	8.39233e-06		306.946	0.392291	0.438141	0.462077	0.471091	0.479484	0.482593	0.460056	0.443581	0.427417			306.946	0.438141	0.471091	0.482593	0.443581
0.301971	7.51038e-06	8.31299e-06	8.74023e-06	8.84399e-06	8.93555e-06	8.95386e-06	8.44727e-06	8.10242e-06	7.73315e-06		301.971	0.382499	0.423376	0.445135	0.45042	0.455083	0.456015	0.430215	0.412652	0.393845			301.971	0.423376	0.45042	0.456015	0.412652
0.296967	7.30591e-06	8.02002e-06	8.36792e-06	8.43811e-06	8.48083e-06	8.43201e-06	7.90405e-06	7.49817e-06	7.05566e-06		296.967	0.372086	0.408455	0.426174	0.429748	0.431924	0.429438	0.402549	0.381878	0.359341			296.967	0.408455	0.429748	0.429438	0.381878
0.291962	7.10754e-06	7.72095e-06	8.03833e-06	8.05359e-06	8.03528e-06	7.94067e-06	7.37e-06	6.89087e-06	6.427e-06		291.962	0.361983	0.393224	0.409388	0.410165	0.409232	0.404414	0.37535	0.350948	0.327324			291.962	0.393224	0.410165	0.404414	0.350948
0.286987	6.91834e-06	7.44019e-06	7.70569e-06	7.68433e-06	7.62024e-06	7.4646e-06	6.83594e-06	6.32629e-06	5.80139e-06		286.987	0.352347	0.378925	0.392447	0.391359	0.388095	0.380168	0.348151	0.322195	0.295462			286.987	0.378925	0.391359	0.380168	0.322195
0.281982	6.71997e-06	7.16248e-06	7.38525e-06	7.30896e-06	7.19604e-06	6.97632e-06	6.34155e-06	5.78613e-06	5.20325e-06		281.982	0.342245	0.364781	0.376127	0.372241	0.366491	0.3553	0.322972	0.294685	0.264999			281.982	0.364781	0.372241	0.3553	0.294685
0.276978	6.52771e-06	6.89087e-06	7.06787e-06	6.95496e-06	6.79016e-06	6.54297e-06	5.85632e-06	5.26123e-06	4.62646e-06		276.978	0.332453	0.350948	0.359963	0.354212	0.345819	0.33323	0.298259	0.267952	0.235623			276.978	0.350948	0.354212	0.33323	0.267952
0.272003	6.32629e-06	6.62231e-06	6.75964e-06	6.60706e-06	6.39648e-06	6.10352e-06	5.3772e-06	4.73633e-06	4.05579e-06		272.003	0.322195	0.337271	0.344265	0.336494	0.325769	0.310849	0.273858	0.241219	0.206559			272.003	0.337271	0.336494	0.310849	0.241219
0.266998	6.13708e-06	6.3446e-06	6.46057e-06	6.27441e-06	6.02722e-06	5.69153e-06	4.93469e-06	4.23584e-06	3.54614e-06		266.998	0.312558	0.323127	0.329033	0.319553	0.306963	0.289866	0.251321	0.215729	0.180603			266.998	0.323127	0.319553	0.289866	0.215729
0.261993	5.93567e-06	6.09436e-06	6.16455e-06	5.95093e-06	5.65186e-06	5.27649e-06	4.49524e-06	3.77197e-06	3.02429e-06		261.993	0.3023	0.310382	0.313957	0.303078	0.287846	0.268729	0.22894	0.192105	0.154026			261.993	0.310382	0.303078	0.268729	0.192105
0.256989	5.7373e-06	5.83191e-06	5.87463e-06	5.62134e-06	5.28564e-06	4.87976e-06	4.05273e-06	3.2959e-06	2.53296e-06		256.989	0.292198	0.297016	0.299192	0.286292	0.269195	0.248524	0.206404	0.167858	0.129002			256.989	0.297016	0.286292	0.248524	0.167858
0.252014	5.53589e-06	5.57556e-06	5.56946e-06	5.29785e-06	4.92248e-06	4.47388e-06	3.61938e-06	2.85034e-06	2.02026e-06		252.014	0.28194	0.28396	0.28365	0.269817	0.2507	0.227852	0.184333	0.145166	0.102891			252.014	0.28396	0.269817	0.227852	0.145166
0.247009	5.33447e-06	5.31921e-06	5.26123e-06	4.96521e-06	4.56238e-06	4.08325e-06	3.18909e-06	2.38342e-06	1.49292e-06		247.009	0.271682	0.270905	0.267952	0.252875	0.232359	0.207958	0.162418	0.121386	0.0760336			247.009	0.270905	0.252875	0.207958	0.121386
0.242035	5.11475e-06	5.0415e-06	4.96521e-06	4.64783e-06	4.19311e-06	3.67126e-06	2.77405e-06	1.88782e-06	1.0141e-06		242.035	0.260491	0.256761	0.252875	0.236711	0.213553	0.186976	0.141281	0.0961455	0.0516475			242.035	0.256761	0.236711	0.186976	0.0961455
0.237	4.90112e-06	4.76379e-06	4.66309e-06	4.28772e-06	3.80859e-06	3.25928e-06	2.28088e-06	1.42426e-06	5.13001e-07		237	0.249612	0.242617	0.237488	0.218371	0.19397	0.165993	0.116164	0.0725365	0.0261268			237	0.242617	0.218371	0.165993	0.0725365
0.232025	4.67835e-06	4.49646e-06	4.3396e-06	3.94897e-06	3.42407e-06	2.84729e-06	1.83258e-06	9.34753e-07	-1.52588e-09		232.025	0.238266	0.229002	0.221013	0.201119	0.174386	0.145011	0.0933324	0.0476065	-7.77122e-05			232.025	0.229002	0.201119	0.145011	0.0476065
0.22702	4.45557e-06	4.20959e-06	4.02832e-06	3.58276e-06	3.03345e-06	2.35962e-06	1.3501e-06	4.50134e-07	-5.2948e-07		227.02	0.22692	0.214392	0.20516	0.182468	0.154492	0.120174	0.0687598	0.0229251	-0.0269661			227.02	0.214392	0.182468	0.120174	0.0229251
0.222015	4.21539e-06	3.92212e-06	3.67737e-06	3.2074e-06	2.57263e-06	1.90552e-06	8.72803e-07	-7.1106e-08	-1.04981e-06		222.015	0.214688	0.199751	0.187286	0.163351	0.131023	0.097047	0.0444514	-0.00362139	-0.053466			222.015	0.199751	0.163351	0.097047	-0.00362139
0.217041	3.97156e-06	3.63098e-06	3.34168e-06	2.76947e-06	2.13898e-06	1.45111e-06	3.83606e-07	-5.85632e-07	-1.60217e-06		217.041	0.202269	0.184924	0.17019	0.141048	0.108937	0.0739043	0.0195368	-0.0298259	-0.0815978			217.041	0.184924	0.141048	0.0739043	-0.0298259
0.212036	3.71277e-06	3.32245e-06	2.92999e-06	2.37091e-06	1.70135e-06	9.64661e-07	-1.33972e-07	-1.12274e-06	-2.13654e-06		212.036	0.189089	0.169211	0.149223	0.120749	0.0866491	0.0491296	-0.00682313	-0.0571806	-0.108813			212.036	0.169211	0.120749	0.0491296	-0.0571806
0.207031	3.45581e-06	2.99774e-06	2.57263e-06	1.97723e-06	1.25915e-06	4.91943e-07	-6.3385e-07	-1.66077e-06	-2.7063e-06		207.031	0.176003	0.152673	0.131023	0.100699	0.0641281	0.0250544	-0.0322816	-0.084582	-0.13783			207.031	0.152673	0.100699	0.0250544	-0.084582
0.202057	3.18359e-06	2.69562e-06	2.20276e-06	1.5683e-06	8.15124e-07	2.13623e-09	-1.12823e-06	-2.18414e-06	-3.26202e-06		202.057	0.162139	0.137286	0.112185	0.0798726	0.0415139	0.000108797	-0.0574604	-0.111237	-0.166133			202.057	0.137286	0.0798726	0.000108797	-0.111237
0.197052	2.90131e-06	2.38586e-06	1.85394e-06	1.16211e-06	3.77502e-07	-4.73328e-07	-1.64642e-06	-2.72247e-06	-3.79578e-06		197.052	0.147762	0.121511	0.0944203	0.0591856	0.019226	-0.0241063	-0.0838514	-0.138654	-0.193317			197.052	0.121511	0.0591856	-0.0241063	-0.138654
0.192047	2.62939e-06	2.06207e-06	1.48132e-06	7.59277e-07	-6.86645e-08	-9.32007e-07	-2.14508e-06	-3.22174e-06	-4.32037e-06		192.047	0.133914	0.10502	0.075443	0.0386696	-0.00349705	-0.0474666	-0.109248	-0.164082	-0.220034			192.047	0.10502	0.0386696	-0.0474666	-0.164082
0.187073	2.3407e-06	1.73462e-06	1.11572e-06	3.67432e-07	-4.77295e-07	-1.38123e-06	-2.59094e-06	-3.70758e-06	-4.81567e-06		187.073	0.11921	0.0883432	0.0568232	0.0187131	-0.0243084	-0.0703451	-0.131955	-0.188825	-0.24526			187.073	0.0883432	0.0187131	-0.0703451	-0.188825
0.182037	2.05749e-06	1.41937e-06	7.76367e-07	-1.86157e-08	-8.74329e-07	-1.79993e-06	-3.01758e-06	-4.15436e-06	-5.27039e-06		182.037	0.104787	0.0722879	0.03954	-0.000948089	-0.0445291	-0.0916693	-0.153684	-0.211579	-0.268418			182.037	0.0722879	-0.000948089	-0.0916693	-0.211579
0.177063	1.78162e-06	1.12061e-06	4.55017e-07	-3.8147e-07	-1.25946e-06	-2.18079e-06	-3.40759e-06	-4.56848e-06	-5.69458e-06		177.063	0.0907367	0.0570718	0.0231738	-0.019428	-0.0641436	-0.111066	-0.173547	-0.23267	-0.290022			177.063	0.0570718	-0.019428	-0.111066	-0.23267
0.172058	1.50604e-06	8.34961e-07	1.42212e-07	-7.18079e-07	-1.58478e-06	-2.53601e-06	-3.7854e-06	-4.93469e-06	-6.09131e-06		172.058	0.0767019	0.0425241	0.00724278	-0.0365714	-0.0807119	-0.129158	-0.192788	-0.251321	-0.310227			172.058	0.0425241	-0.0365714	-0.129158	-0.251321
0.167084	1.25183e-06	5.69763e-07	-1.48621e-07	-1.01288e-06	-1.90979e-06	-2.86133e-06	-4.10431e-06	-5.27954e-06	-6.40564e-06		167.084	0.0637551	0.0290177	-0.00756917	-0.0515853	-0.0972646	-0.145726	-0.20903	-0.268884	-0.326236			167.084	0.0290177	-0.0515853	-0.145726	-0.268884
0.162079	1.01044e-06	3.302e-07	-3.90015e-07	-1.28571e-06	-2.17682e-06	-3.13843e-06	-4.37256e-06	-5.53589e-06	-6.6803e-06		162.079	0.051461	0.0168169	-0.0198632	-0.0654803	-0.110864	-0.159838	-0.222692	-0.28194	-0.340224			162.079	0.0168169	-0.0654803	-0.159838	-0.28194
0.157074	7.87964e-07	1.01623e-07	-6.32935e-07	-1.52496e-06	-2.42035e-06	-3.38257e-06	-4.62067e-06	-5.78003e-06	-6.93054e-06		157.074	0.0401306	0.00517563	-0.032235	-0.0776655	-0.123267	-0.172272	-0.235328	-0.294374	-0.352969			157.074	0.00517563	-0.0776655	-0.172272	-0.294374
0.1521	5.83496e-07	-9.91821e-08	-8.24585e-07	-1.73554e-06	-2.63397e-06	-3.5852e-06	-4.84009e-06	-5.98144e-06	-7.12891e-06		152.1	0.0297171	-0.00505129	-0.0419957	-0.0883899	-0.134147	-0.182593	-0.246503	-0.304632	-0.363071			152.1	-0.00505129	-0.0883899	-0.182593	-0.304632
0.147095	4.01611e-07	-2.63977e-07	-1.00281e-06	-1.92078e-06	-2.80151e-06	-3.75153e-06	-5.00183e-06	-6.14319e-06	-7.27844e-06		147.095	0.0204538	-0.0134442	-0.0510725	-0.0978241	-0.14268	-0.191063	-0.254741	-0.312869	-0.370687			147.095	-0.0134442	-0.0978241	-0.191063	-0.312869
0.14209	2.42615e-07	-4.23584e-07	-1.16089e-06	-2.0639e-06	-2.94464e-06	-3.89191e-06	-5.13916e-06	-6.28662e-06	-7.42187e-06		142.09	0.0123562	-0.0215729	-0.0591235	-0.105114	-0.149969	-0.198213	-0.261735	-0.320174	-0.377992			142.09	-0.0215729	-0.105114	-0.198213	-0.320174
0.137085	1.09863e-07	-5.39246e-07	-1.26373e-06	-2.18536e-06	-3.06122e-06	-4.00909e-06	-5.23682e-06	-6.39648e-06	-7.52258e-06		137.085	0.00559528	-0.0274635	-0.0643612	-0.111299	-0.155906	-0.204181	-0.266708	-0.325769	-0.383121			137.085	-0.0274635	-0.111299	-0.204181	-0.325769
0.132111	-1.0376e-08	-6.41174e-07	-1.37482e-06	-2.27417e-06	-3.15491e-06	-4.08539e-06	-5.32532e-06	-6.45447e-06	-7.59277e-06		132.111	-0.000528443	-0.0326547	-0.0700187	-0.115822	-0.160678	-0.208067	-0.271216	-0.328723	-0.386696			132.111	-0.0326547	-0.115822	-0.208067	-0.328723
0.127106	-9.97925e-08	-7.15637e-07	-1.44196e-06	-2.34436e-06	-3.22266e-06	-4.14703e-06	-5.38025e-06	-6.51245e-06	-7.63245e-06		127.106	-0.00508238	-0.036447	-0.073438	-0.119397	-0.164128	-0.211206	-0.274013	-0.331676	-0.388716			127.106	-0.036447	-0.119397	-0.211206	-0.331676
0.122101	-1.76392e-07	-7.84607e-07	-1.50421e-06	-2.40448e-06	-3.27667e-06	-4.19495e-06	-5.41992e-06	-6.52466e-06	-7.65686e-06		122.101	-0.00898353	-0.0399596	-0.0766087	-0.122459	-0.166879	-0.213646	-0.276034	-0.332297	-0.38996			122.101	-0.0399596	-0.122459	-0.213646	-0.332297
0.117126	-2.31018e-07	-8.28857e-07	-1.5448e-06	-2.43927e-06	-3.3078e-06	-4.21875e-06	-5.43518e-06	-6.56128e-06	-7.65076e-06		117.126	-0.0117656	-0.0422133	-0.0786758	-0.124231	-0.168464	-0.214859	-0.276811	-0.334162	-0.389649			117.126	-0.0422133	-0.124231	-0.214859	-0.334162
0.112122	-2.79541e-07	-8.69446e-07	-1.57867e-06	-2.46979e-06	-3.32031e-06	-4.2334e-06	-5.45044e-06	-6.57349e-06	-7.67212e-06		112.122	-0.0142369	-0.0442804	-0.080401	-0.125785	-0.169102	-0.215605	-0.277588	-0.334784	-0.390737			112.122	-0.0442804	-0.125785	-0.215605	-0.334784
0.107117	-3.14636e-07	-8.99658e-07	-1.59363e-06	-2.49176e-06	-3.349e-06	-4.24652e-06	-5.43213e-06	-6.53992e-06	-7.62634e-06		107.117	-0.0160243	-0.0458191	-0.0811626	-0.126904	-0.170563	-0.216273	-0.276655	-0.333074	-0.388406			107.117	-0.0458191	-0.126904	-0.216273	-0.333074
0.102112	-3.41187e-07	-9.14001e-07	-1.60706e-06	-2.49237e-06	-3.33527e-06	-4.24194e-06	-5.41992e-06	-6.53381e-06	-7.60193e-06		102.112	-0.0173764	-0.0465496	-0.0818465	-0.126935	-0.169863	-0.21604	-0.276034	-0.332764	-0.387162			102.112	-0.0465496	-0.126935	-0.21604	-0.332764
0.097137	-3.62244e-07	-9.32922e-07	-1.61865e-06	-2.49756e-06	-3.3313e-06	-4.22516e-06	-5.41077e-06	-6.50635e-06	-7.58362e-06		97.137	-0.0184489	-0.0475132	-0.0824371	-0.127199	-0.169661	-0.215185	-0.275567	-0.331365	-0.38623			97.137	-0.0475132	-0.127199	-0.215185	-0.331365
0.092133	-3.76282e-07	-9.40857e-07	-1.62415e-06	-2.4942e-06	-3.32336e-06	-4.21143e-06	-5.40161e-06	-6.47888e-06	-7.5592e-06		92.133	-0.0191638	-0.0479173	-0.0827169	-0.127028	-0.169257	-0.214486	-0.275101	-0.329966	-0.384986			92.133	-0.0479173	-0.127028	-0.214486	-0.329966
0.087128	-3.85437e-07	-9.42688e-07	-1.62659e-06	-2.4939e-06	-3.31726e-06	-4.216e-06	-5.38635e-06	-6.44836e-06	-7.52258e-06		87.128	-0.0196301	-0.0480106	-0.0828412	-0.127013	-0.168946	-0.214719	-0.274324	-0.328412	-0.383121			87.128	-0.0480106	-0.127013	-0.214719	-0.328412
0.082153	-3.93372e-07	-9.52759e-07	-1.62476e-06	-2.48932e-06	-3.30322e-06	-4.1861e-06	-5.36194e-06	-6.41785e-06	-7.50122e-06		82.153	-0.0200342	-0.0485235	-0.082748	-0.12678	-0.168231	-0.213196	-0.273081	-0.326857	-0.382033			82.153	-0.0485235	-0.12678	-0.213196	-0.326857
0.077148	-3.97949e-07	-9.43909e-07	-1.61774e-06	-2.47864e-06	-3.29315e-06	-4.17236e-06	-5.33752e-06	-6.39648e-06	-7.46155e-06		77.148	-0.0202673	-0.0480728	-0.0823905	-0.126236	-0.167718	-0.212496	-0.271837	-0.325769	-0.380013			77.148	-0.0480728	-0.126236	-0.212496	-0.325769
0.072144	-4.00391e-07	-9.53064e-07	-1.62293e-06	-2.47345e-06	-3.28339e-06	-4.15558e-06	-5.31921e-06	-6.38123e-06	-7.42187e-06		72.144	-0.0203917	-0.048539	-0.0826547	-0.125971	-0.167221	-0.211641	-0.270905	-0.324992	-0.377992			72.144	-0.048539	-0.125971	-0.211641	-0.324992
0.067169	-4.01306e-07	-9.38415e-07	-1.60919e-06	-2.46704e-06	-3.27789e-06	-4.14124e-06	-5.3009e-06	-6.34766e-06	-7.40356e-06		67.169	-0.0204383	-0.047793	-0.0819553	-0.125645	-0.166941	-0.210911	-0.269972	-0.323283	-0.37706			67.169	-0.047793	-0.125645	-0.210911	-0.323283
0.062164	-4.02222e-07	-9.375e-07	-1.6037e-06	-2.46582e-06	-3.26904e-06	-4.11713e-06	-5.27954e-06	-6.32019e-06	-7.37305e-06		62.164	-0.0204849	-0.0477464	-0.0816755	-0.125583	-0.166491	-0.209683	-0.268884	-0.321884	-0.375505			62.164	-0.0477464	-0.125583	-0.209683	-0.321884
0.057159	-4.00696e-07	-9.38415e-07	-1.5979e-06	-2.45209e-06	-3.25073e-06	-4.12231e-06	-5.25513e-06	-6.30188e-06	-7.35474e-06		57.159	-0.0204072	-0.047793	-0.0813802	-0.124883	-0.165558	-0.209947	-0.267641	-0.320951	-0.374573			57.159	-0.047793	-0.124883	-0.209947	-0.320951
0.052185	-4.01611e-07	-9.34753e-07	-1.5976e-06	-2.44019e-06	-3.25317e-06	-4.09851e-06	-5.23987e-06	-6.27747e-06	-7.33948e-06		52.185	-0.0204538	-0.0476065	-0.0813647	-0.124277	-0.165682	-0.208735	-0.266864	-0.319708	-0.373796			52.185	-0.0476065	-0.124277	-0.208735	-0.319708
0.04718	-4.00696e-07	-9.31396e-07	-1.59302e-06	-2.43195e-06	-3.23975e-06	-4.08997e-06	-5.21545e-06	-6.2561e-06	-7.2937e-06		47.18	-0.0204072	-0.0474355	-0.0811316	-0.123858	-0.164999	-0.2083	-0.26562	-0.31862	-0.371464			47.18	-0.0474355	-0.123858	-0.2083	-0.31862
0.042175	-3.97644e-07	-9.32922e-07	-1.58417e-06	-2.42645e-06	-3.21411e-06	-4.07776e-06	-5.20325e-06	-6.25305e-06	-7.26623e-06		42.175	-0.0202518	-0.0475132	-0.0806808	-0.123578	-0.163693	-0.207678	-0.264999	-0.318465	-0.370065			42.175	-0.0475132	-0.123578	-0.207678	-0.318465
0.037201	-3.98865e-07	-9.30176e-07	-1.57806e-06	-2.41913e-06	-3.2132e-06	-4.07471e-06	-5.19409e-06	-6.21643e-06	-7.25098e-06		37.201	-0.020314	-0.0473734	-0.08037	-0.123205	-0.163646	-0.207523	-0.264532	-0.316599	-0.369288			37.201	-0.0473734	-0.123205	-0.207523	-0.316599
0.032196	-3.9856e-07	-9.22241e-07	-1.57623e-06	-2.40753e-06	-3.25073e-06	-4.05273e-06	-5.16052e-06	-6.19812e-06	-7.22961e-06		32.196	-0.0202984	-0.0469692	-0.0802767	-0.122614	-0.165558	-0.206404	-0.262823	-0.315667	-0.3682			32.196	-0.0469692	-0.122614	-0.206404	-0.315667
0.027191	-3.93372e-07	-9.15222e-07	-1.56403e-06	-2.41333e-06	-3.16711e-06	-4.03412e-06	-5.16357e-06	-6.18286e-06	-7.19299e-06		27.191	-0.0200342	-0.0466118	-0.079655	-0.12291	-0.161299	-0.205456	-0.262978	-0.31489	-0.366335			27.191	-0.0466118	-0.12291	-0.205456	-0.31489
0.022217	-3.93066e-07	-9.25903e-07	-1.53137e-06	-2.40601e-06	-3.17291e-06	-4.02679e-06	-5.14526e-06	-6.1676e-06	-7.2052e-06		22.217	-0.0200187	-0.0471558	-0.077992	-0.122537	-0.161595	-0.205082	-0.262046	-0.314113	-0.366957			22.217	-0.0471558	-0.122537	-0.205082	-0.314113
0.017212	-3.95813e-07	-9.14307e-07	-1.55762e-06	-2.38586e-06	-3.16925e-06	-4.01123e-06	-5.13001e-06	-6.14624e-06	-7.16858e-06		17.212	-0.0201585	-0.0465651	-0.0793286	-0.121511	-0.161408	-0.20429	-0.261268	-0.313025	-0.365092			17.212	-0.0465651	-0.121511	-0.20429	-0.313025
0.012207	-3.92761e-07	-9.14917e-07	-1.54022e-06	-2.37762e-06	-3.18298e-06	-4.00146e-06	-5.11475e-06	-6.13403e-06	-7.14417e-06
0.007233	-3.92151e-07	-9.09424e-07	-1.55975e-06	-2.37122e-06	-3.1604e-06	-3.98895e-06	-5.10254e-06	-6.10657e-06	-7.12891e-06
